# Supplementary material
Source: MDPI journal article supplement (https://www.mdpi.com/1424-2818/14/11/940)
Supplement: s1 [file s1]

**Table S-I 1.** Summary of the mosquito collections that were used in the study. The analysed specimens are indicated by their tube source code, species, number of specimens analysed, sex, PCR code, country of origin, as identified through online tools (Bold and Blastn) and access numbers of sequences.

| Nº | Specimen code |    |         | Idem                   | Nº | Sex | PCR code | Country      | BLASTn (%)             |          | BOLD Systems (%)       |               | nt       | Access numbers | ACE2 | CQ11 |
|----|---------------|----|---------|------------------------|----|-----|----------|--------------|------------------------|----------|------------------------|---------------|----------|----------------|------|------|
| 1  | MZ074         | a9 | 4       | <i>Ma. africana</i>    | 1  | f   | EM 001   | Mozambique   | <i>Ma. africana</i>    | 99,61    | <i>Ma. africana</i>    | 99,61 - 96,62 | 512      | LC664013       | NA   | NA   |
| 2  | MZ012         | j  | 2       | <i>Ma. africana</i>    | 1  | m   | EM 002   | Mozambique   | Negative               | Negative | Negative               | Negative      | Negative | Negative       | NA   | NA   |
| 3  | MZ012         | j  | 3       | <i>Ma. africana</i>    | 1  | m   | EM 003   | Mozambique   | Negative               | Negative | Negative               | Negative      | Negative | Negative       | NA   | NA   |
| 4  | MZ012         | j  | 4       | <i>Ma. africana</i>    | 1  | m   | EM 004   | Mozambique   | Negative               | Negative | Negative               | Negative      | Negative | Negative       | NA   | NA   |
| 5  | MZ012         | j  | 5       | <i>Ma. africana</i>    | 1  | m   | EM 005   | Mozambique   | Negative               | Negative | Negative               | Negative      | Negative | Negative       | NA   | NA   |
| 6  | MZ012         | j  | 6       | <i>Ma. africana</i>    | 1  | m   | EM 006   | Mozambique   | Negative               | Negative | Negative               | Negative      | Negative | Negative       | NA   | NA   |
| 7  | MZ012         | j  | 7       | <i>Ma. africana</i>    | 1  | m   | EM 007   | Mozambique   | Negative               | Negative | Negative               | Negative      | Negative | Negative       | NA   | NA   |
| 8  | MZ012         | j  | 8       | <i>Ma. africana</i>    | 1  | m   | EM 008   | Mozambique   | <i>Ma. africana</i>    | 99,84    | <i>Ma. africana</i>    | 100 - 97,16   | 633      | LC664014       | NA   | NA   |
| 9  | MZ012         | j  | 10      | <i>Ma. africana</i>    | 1  | m   | EM 009   | Mozambique   | Negative               | Negative | Negative               | Negative      | Negative | Negative       | NA   | NA   |
| 10 | MZ012         | j  | 11      | <i>Ma. africana</i>    | 1  | m   | EM 010   | Mozambique   | <i>Ma. africana</i>    | 99,8     | <i>Ma. africana</i>    | 99,61 - 97,47 | 513      | LC664015       | NA   | NA   |
| 11 | MZ012         | j  | 12      | <i>Ma. africana</i>    | 1  | m   | EM 011   | Mozambique   | <i>Ma. africana</i>    | 100      | <i>Ma. africana</i>    | 100 - 97,05   | 508      | LC664016       | NA   | NA   |
| 12 | GAU090        | b3 | b1<br>6 | <i>Cx. univittatus</i> | 1  | f   | EM 012   | South Africa | <i>Cx. univittatus</i> | 100      | <i>Cx. univittatus</i> | 100 - 95,88   | 634      | LC669927       | NA   | NA   |
| 13 | KYA082        | e  |         | <i>Cx. univittatus</i> | 1  | f   | EM 013   | South Africa | <i>Cx. univittatus</i> | 100      | <i>Cx. univittatus</i> | 100 - 95,91   | 636      | LC669928       | NA   | NA   |
| 14 | LAP244        | b  |         | <i>Cx. perexiguus</i>  | 1  | f   | EM 014   | South Africa | <i>Cx. perexiguus</i>  | 100      | <i>Cx. perexiguus</i>  | 100 - 99,84   | 635      | LC669929       | NA   | NA   |
| 15 | MZ005         | j  | 26      | <i>Cx. univittatus</i> | 1  | m   | EM 015   | Mozambique   | Negative               | Negative | Negative               | Negative      | Negative | Negative       | NA   | NA   |
| 16 | MZ119         | c2 | 1       | <i>Cx. neavei</i>      | 1  | m   | EM 016   | Mozambique   | <i>Cx. neavei</i>      | 98,46    | <i>Cx. univittatus</i> | 98,57 - 96,43 | 584      | LC663986       | NA   | NA   |
| 17 | GAU 347       | i  | 3       | <i>Cx. univittatus</i> | 1  | m   | EM 017   | South Africa | <i>Cx. univittatus</i> | 99,69    | <i>Cx. univittatus</i> | 100 - 95,91   | 636      | LC670085       | NA   | NA   |
| 18 | GAU091        | f  | 6       | <i>Cx. univittatus</i> | 1  | m   | EM 018   | South Africa | Negative               | Negative | Negative               | Negative      | Negative | Negative       | NA   | NA   |
| 19 | KYA064        | e  | 2       | <i>Cx. univittatus</i> | 1  | M   | EM 019   | South Africa | Negative               | Negative | Negative               | Negative      | Negative | Negative       | NA   | NA   |
| 20 | KYA070        | g  | 5       | <i>Cx. univittatus</i> | 1  | m   | EM 020   | South Africa | Negative               | Negative | Negative               | Negative      | Negative | Negative       | NA   | NA   |
| 21 | KZN 034       | c  | 1       | <i>Cx. univittatus</i> | 1  | m   | EM 021   | South Africa | <i>Cx. univittatus</i> | 99,53    | <i>Cx. univittatus</i> | 99,68 - 95,91 | 636      | LC670086       | NA   | NA   |
| 22 | SA 062        | c  | 3       | <i>Cx. univittatus</i> | 1  | m   | EM 022   | South Africa | Negative               | Negative | Negative               | Negative      | Negative | Negative       | NA   | NA   |

|    |           |    |    |                        |   |   |        |              |                        |          |                        |               |          |          |    |    |
|----|-----------|----|----|------------------------|---|---|--------|--------------|------------------------|----------|------------------------|---------------|----------|----------|----|----|
| 23 | SA 060    | a  |    | <i>Cx. univittatus</i> | 1 | m | EM 023 | South Africa | Negative               | Negative | Negative               | Negative      | Negative | Negative | NA | NA |
| 24 | MZ005     | j  | 23 | <i>Cx. simpsoni</i>    | 1 | m | EM 024 | Mozambique   | <i>Cx. sinaiticus</i>  | 99,52    | <i>Cx. sinaiticus</i>  | 99,52 - 92,75 | 625      | LC664005 | NA | NA |
| 25 | MZ005     | j  | 28 | <i>Cx. simpsoni</i>    | 1 | m | EM 025 | Mozambique   | <i>Cx. sinaiticus</i>  | 99,76    | <i>Cx. sinaiticus</i>  | 98,96 - 91,88 | 501      | LC664006 | NA | NA |
| 26 | MZ001     | r  | 1  | <i>Cx. simpsoni</i>    | 1 | m | EM 026 | Mozambique   | <i>Cx. sinaiticus</i>  | 100      | <i>Cx. sinaiticus</i>  | 100 - 93,08   | 626      | LC664007 | NA | NA |
| 27 | MZ005     | j  | 21 | <i>Cx. simpsoni</i>    | 1 | f | EM 027 | Mozambique   | Negative               | Negative | Negative               | Negative      | Negative | Negative | NA | NA |
| 28 | MZ011     | n  | 1  | <i>Cx. neavei</i>      | 1 | f | EM 028 | Mozambique   | <i>Cx. neavei</i>      | 100      | <i>Cx. neavei</i>      | 100 - 94,48   | 511      | LC663987 | NA | NA |
| 29 | MZ014     | i  | 1  | <i>Cx. neavei</i>      | 1 | f | EM 029 | Mozambique   | <i>Cx. neavei</i>      | 99,34    | <i>Cx. neavei</i>      | 99,34 - 93,64 | 456      | LC663988 | NA | NA |
| 30 | MZ014     | i  | 2  | <i>Cx. neavei</i>      | 1 | f | EM 030 | Mozambique   | <i>Cx. neavei</i>      | 99,56    | <i>Cx. neavei</i>      | 96,56 - 93,86 | 456      | LC663989 | NA | NA |
| 31 | KYA068    | d  | 4  | <i>Cx. andersoni</i>   | 1 | m | EM 031 | South Africa | <i>Cx. theileri</i>    | 96,96    | -                      | -             | 635      | LC669930 | NA | NA |
| 32 | LAP260    | o  | 2  | <i>Cx. simpsoni</i>    | 1 | m | EM 032 | South Africa | <i>Cx. sinaiticus</i>  | 99,84    | <i>Cx. sinaiticus</i>  | 99,84 - 93,21 | 637      | LC669931 | NA | NA |
| 33 | MAK 003   | S  | 2  | <i>Cx. simpsoni</i>    | 1 | m | EM 033 | South Africa | <i>Cx. sinaiticus</i>  | 100      | <i>Cx. sinaiticus</i>  | 100 - 93,21   | 637      | LC669932 | NA | NA |
| 34 | PTH 020   |    |    | <i>Cx. simpsoni</i>    | 1 | m | EM 034 | South Africa | Negative               | Negative | Negative               | Negative      | Negative | Negative | NA | NA |
| 35 | GAU092    | a2 | a6 | <i>Cx. univittatus</i> | 1 | f | EM 035 | South Africa | Negative               | Negative | Negative               | Negative      | Negative | Negative | NA | NA |
| 36 | GAU086    | d3 | d5 | <i>Cx. univittatus</i> | 1 | f | EM 036 | South Africa | <i>Cx. univittatus</i> | 100      | <i>Cx. univittatus</i> | 100 - 95,88   | 635      | LC669933 | NA | NA |
| 37 | KYA072    | e4 | 5  | <i>Cx. univittatus</i> | 1 | f | EM 037 | South Africa | Negative               | Negative | Negative               | Negative      | Negative | Negative | NA | NA |
| 38 | SA 062    | c  |    | <i>Cx. univittatus</i> | 1 | f | EM 038 | South Africa | <i>Cx. univittatus</i> | 99,83    | <i>Cx. univittatus</i> | 99,83 - 95,85 | 605      | LC669934 | NA | NA |
| 39 | LAP308 pa | f  |    | <i>Cx. univittatus</i> | 1 | f | EM 039 | South Africa | Negative               | Negative | Negative               | Negative      | Negative | Negative | NA | NA |
| 40 | MZ005     | j  | 25 | <i>Cx. perexiguus</i>  | 1 | m | EM 040 | Mozambique   | <i>Cx. perexiguus</i>  | 100      | <i>Cx. perexiguus</i>  | 100 - 100     | 635      | LC663993 | NA | NA |
| 41 | MZ005     | j  | 24 | <i>Cx. neavei</i>      | 1 | m | EM 041 | Mozambique   | <i>Cx. neavei</i>      | 100      | <i>Cx. neavei</i>      | 100 - 95,26   | 637      | LC663990 | NA | NA |
| 42 | GAU104    | f  | 2  | <i>Cx. univittatus</i> | 1 | m | EM 042 | South Africa | Negative               | Negative | Negative               | Negative      | Negative | Negative | NA | NA |
| 43 | KYA064    | e  | 5  | <i>Cx. univittatus</i> | 1 | M | EM 043 | South Africa | Negative               | Negative | Negative               | Negative      | Negative | Negative | NA | NA |
| 44 | MAR24 4   | c  |    | <i>Cx. univittatus</i> | 1 | m | EM 044 | South Africa | Negative               | Negative | Negative               | Negative      | Negative | Negative | NA | NA |
| 45 | LAP270    | k  | 2  | <i>Cx. univittatus</i> | 1 | m | EM 045 | South Africa | <i>Cx. univittatus</i> | 100      | <i>Cx. univittatus</i> | 100 - 95,89   | 440      | LC669935 | NA | NA |
| 46 | MZ089     | d3 | 1  | <i>Cx. neavei</i>      | 1 | m | EM 046 | Mozambique   | <i>Cx. neavei</i>      | 99,84    | <i>Cx. neavei</i>      | 99,84 - 95,08 | 635      | LC663991 | NA | NA |
| 47 | MZ005     | j  | 29 | <i>Cx. simpsoni</i>    | 1 | m | EM 047 | Mozambique   | Negative               | Negative | Negative               | Negative      | Negative | Negative | NA | NA |
| 48 | MZ005     | j  | 30 | <i>Cx. simpsoni</i>    | 1 | m | EM 048 | Mozambique   | Negative               | Negative | Negative               | Negative      | Negative | Negative | NA | NA |
| 49 | MZ005     | j  | 31 | <i>Cx. perexiguus</i>  | 1 | m | EM 049 | Mozambique   | <i>Cx. perexiguus</i>  | 100      | <i>Cx. perexiguus</i>  | 100 - 99,84   | 629      | LC663994 | NA | NA |

|    |            |    |    |                       |   |   |        |              |                                |          |                       |               |          |          |    |    |
|----|------------|----|----|-----------------------|---|---|--------|--------------|--------------------------------|----------|-----------------------|---------------|----------|----------|----|----|
| 50 | MZ005      | j  | 32 | <i>Cx. simpsoni</i>   | 1 | m | EM 050 | Mozambique   | Negative                       | Negative | Negative              | Negative      | Negative | Negative | NA | NA |
| 51 | MZ005      | j  | 35 | <i>Cx. simpsoni</i>   | 1 | m | EM 051 | Mozambique   | Negative                       | Negative | Negative              | Negative      | Negative | Negative | NA | NA |
| 52 | MZ011      | n  | 2  | <i>Cx. simpsoni</i>   | 1 | f | EM 052 | Mozambique   | Negative                       | Negative | Negative              | Negative      | Negative | Negative | NA | NA |
| 53 | MZ005      | h  | 1  | <i>Cx. simpsoni</i>   | 1 | f | EM 053 | Mozambique   | Negative                       | Negative | Negative              | Negative      | Negative | Negative | NA | NA |
| 54 | MZ083      | g1 | 2  | <i>Lt. tigripes</i>   | 1 | m | EM 054 | Mozambique   | Negative                       | Negative | Negative              | Negative      | Negative | Negative | NA | NA |
| 55 | MAR26<br>4 | j  |    | <i>Lt. tigripes</i>   | 1 | m | EM 055 | South Africa | <i>Lt. tigripes</i>            | 100      | <i>Lt. tigripes</i>   | 100 - 94,98   | 622      | LC669936 | NA | NA |
| 56 | LAP230     | l  | 2  | <i>Lt. tigripes</i>   | 1 | m | EM 056 | South Africa | <i>Lt. tigripes</i>            | 99,2     | <i>Lt. tigripes</i>   | 99,60 - 95,11 | 623      | LC669937 | NA | NA |
| 57 | ANG<br>006 | b  |    | <i>Lt. tigripes</i>   | 1 | f | EM 057 | Angola       | <i>Lt. tigripes</i>            | 100      | <i>Lt. tigripes</i>   | 100 - 95,01   | 626      | LC670071 | NA | NA |
| 58 | ANG<br>035 | d  |    | <i>Lt. tigripes</i>   | 1 | f | EM 058 | Angola       | <i>Lt. tigripes</i>            | 100      | <i>Lt. tigripes</i>   | 100 - 95,35   | 520      | LC670072 | NA | NA |
| 59 | ANG<br>031 | b  |    | <i>Lt. tigripes</i>   | 1 | f | EM 059 | Angola       | Negative                       | Negative | Negative              | Negative      | Negative | Negative | NA | NA |
| 60 | MZ011      | f1 | 2  | <i>Cx. antennatus</i> | 1 | f | EM 060 | Mozambique   | <i>Cx. antennatus</i>          | 100      | <i>Cx. antennatus</i> | 100 - 93,65   | 634      | LC663980 | NA | NA |
| 61 | MZ022      | v  | 7  | <i>Cx. antennatus</i> | 1 | f | EM 061 | Mozambique   | <i>Cx. antennatus</i>          | 100      | <i>Cx. antennatus</i> | 100 - 93,65   | 635      | LC663981 | NA | NA |
| 62 | MZ032      | c2 | 1  | <i>Cx. antennatus</i> | 1 | m | EM 062 | Mozambique   | <i>Cx. sp. 1 CLJ-2018</i>      | 99,78    | <i>Cx. antennatus</i> | 100 - 94,03   | 455      | LC663982 | NA | NA |
| 63 | PTH 007    | a  | 1  | <i>Cx. antennatus</i> | 1 | m | EM 063 | South Africa | <i>Cx. antennatus</i>          | 100      | <i>Cx. antennatus</i> | 100 - 93,68   | 636      | LC670090 | NA | NA |
| 64 | PTH 009    | a  | 1  | <i>Cx. antennatus</i> | 1 | m | EM 064 | South Africa | <i>Cx. antennatus</i>          | 99,84    | <i>Cx. antennatus</i> | 100 - 93,55   | 639      | LC670091 | NA | NA |
| 65 | MZ079      | e1 | 1  | <i>Cx. poicilipes</i> | 1 | m | EM 065 | Mozambique   | <i>Cx. poicilipes</i>          | 99,53    | <i>Cx. poicilipes</i> | 99,84 - 94,26 | 632      | LC663996 | NA | NA |
| 66 | MZ119      | f2 | 1  | <i>Cx. poicilipes</i> | 1 | m | EM 066 | Mozambique   | <i>Cx. sp. 20974_Cu-licF09</i> | 99,34    | <i>Cx. poicilipes</i> | 100 - 94,92   | 455      | LC663997 | NA | NA |
| 67 | MAR21<br>8 | g  | 2  | <i>Cx. poicilipes</i> | 1 | m | EM 067 | South Africa | Negative                       | Negative | Negative              | Negative      | Negative | Negative | NA | NA |
| 68 | LAP232     | w  |    | <i>Cx. poicilipes</i> | 1 | m | EM 068 | South Africa | <i>Cx. sp. 20974_Cu-licF09</i> | 100      | <i>Cx. poicilipes</i> | 100 - 94,72   | 494      | LC669938 | NA | NA |
| 69 | MAN<br>709 | o  |    | <i>Cx. poicilipes</i> | 1 | m | EM 069 | South Africa | Negative                       | Negative | Negative              | Negative      | Negative | Negative | NA | NA |
| 70 | LAP230     | l  | 1  | <i>Cx. poicilipes</i> | 1 | m | EM 070 | South Africa | Negative                       | Negative | Negative              | Negative      | Negative | Negative | NA | NA |
| 71 | MAR25<br>4 | l  | 1  | <i>Cx. poicilipes</i> | 1 | m | EM 071 | South Africa | Negative                       | Negative | Negative              | Negative      | Negative | Negative | NA | NA |
| 72 | MZ011      | y  | 1  | <i>Cx. poicilipes</i> | 1 | f | EM 072 | Mozambique   | Negative                       | Negative | Negative              | Negative      | Negative | Negative | NA | NA |
| 73 | GAU088     | f  | 1  | <i>Cx. theileri</i>   | 1 | m | EM 073 | South Africa | <i>Cx. mirificus</i>           | 99,05    | <i>Cx. theileri</i>   | 100 - 99,04   | 524      | LC669939 | NA | NA |
| 74 | LAP272     | r  |    | <i>Cx. decens</i>     | 1 | m | EM 074 | South Africa | <i>Cx. watti</i>               | 95,93    | <i>Cx. decens</i>     | 99,84 - 95,91 | 639      | LC669940 | NA | NA |

|     |              |    |   |                        |   |   |        |              |                        |          |                        |               |          |          |    |    |
|-----|--------------|----|---|------------------------|---|---|--------|--------------|------------------------|----------|------------------------|---------------|----------|----------|----|----|
| 75  | KYA071       | e  | 3 | <i>Cx. theileri</i>    | 1 | m | EM 075 | South Africa | <i>Cx. theileri</i>    | 100      | <i>Cx. theileri</i>    | 100 - 99,12   | 455      | LC669941 | NA | NA |
| 76  | MAR25<br>3   | l  | 1 | <i>Ae. unilineatus</i> | 1 | m | EM 076 | South Africa | Negative               | Negative | Negative               | Negative      | Negative | Negative | NA | NA |
| 77  | KRU038       | f  |   | <i>Ae. unilineatus</i> | 1 | m | EM 077 | South Africa | <i>Ae. sp. 1 pk</i>    | 95,06    | <i>Ae. aegypti</i>     | 99,84 - 90,62 | 628      | LC669942 | NA | NA |
| 78  | LAP271       | t  | 2 | <i>Ae. unilineatus</i> | 1 | m | EM 078 | South Africa | <i>Ae. sp. 1 pk</i>    | 95,28    | <i>Ae. aegypti</i>     | 98,73 - 90,86 | 635      | LC669943 | NA | NA |
| 79  | LAP244       | j  |   | <i>Ae. unilineatus</i> | 1 | f | EM 079 | South Africa | <i>Ae. sp. 1 pk</i>    | 95,22    | <i>Ae. aegypti</i>     | 99,36 - 90,56 | 627      | LC669944 | NA | NA |
| 80  | LAP232       | f  |   | <i>Ae. unilineatus</i> | 1 | f | EM 080 | South Africa | Negative               | Negative | Negative               | Negative      | Negative | Negative | NA | NA |
| 81  | LAP291       | l  |   | <i>Ae. unilineatus</i> | 1 | f | EM 081 | South Africa | Negative               | Negative | Negative               | Negative      | Negative | Negative | NA | NA |
| 82  | KZN 210      | e  |   | <i>Ae. unilineatus</i> | 1 | m | EM 082 | South Africa | <i>Ae. sp. 1 pk</i>    | 94,8     | <i>Ae. aegypti</i>     | 99,52 - 90,63 | 635      | LC669945 | NA | NA |
| 83  | MZ114        | d2 | 1 | <i>Ae. vittatus</i>    | 1 | m | EM 083 | Mozambique   | <i>Ae. vittatus</i>    | 99,84    | <i>Ae. vittatus</i>    | 99,84 - 94,32 | 635      | LC662755 | NA | NA |
| 84  | MZ005        | n  | 1 | <i>Ae. vittatus</i>    | 1 | m | EM 084 | Mozambique   | Negative               | Negative | Negative               | Negative      | Negative | Negative | NA | NA |
| 85  | LAP268       | r  | 2 | <i>Ae. vittatus</i>    | 1 | m | EM 085 | South Africa | <i>Ae. vittatus</i>    | 99,52    | <i>Ae. vittatus</i>    | 99,52 - 94,03 | 627      | LC669946 | NA | NA |
| 86  | LAP244       | i  |   | <i>Ae. vittatus</i>    | 1 | f | EM 086 | South Africa | Negative               | Negative | Negative               | Negative      | Negative | Negative | NA | NA |
| 87  | LAP308<br>pa | i  |   | <i>Ae. vittatus</i>    | 1 | f | EM 087 | South Africa | <i>Ae. vittatus</i>    | 99,68    | <i>Ae. vittatus</i>    | 99,84 - 94,15 | 628      | LC669947 | NA | NA |
| 88  | SA 059       | e1 | 2 | <i>Cx. trifilatus</i>  | 1 | m | EM 088 | South Africa | Negative               | Negative | Negative               | Negative      | Negative | Negative | NA | NA |
| 89  | SA 059       | e1 | 4 | <i>Cx. trifilatus</i>  | 1 | m | EM 089 | South Africa | Negative               | Negative | Negative               | Negative      | Negative | Negative | NA | NA |
| 90  | SA 059       | e2 | 4 | <i>Cx. trifilatus</i>  | 1 | m | EM 090 | South Africa | <i>Cx. pipiens</i>     | 97,61    | <i>Cx. trifilatus</i>  | 99,68 - 97,28 | 628      | LC669948 | NA | NA |
| 91  | SA 059       | e2 | 5 | <i>Cx. trifilatus</i>  | 1 | m | EM 091 | South Africa | <i>Cx. pipiens</i>     | 97,93    | <i>Cx. trifilatus</i>  | 99,68 - 97,27 | 633      | LC669949 | NA | NA |
| 92  | SA 059       | d1 |   | <i>Cx. trifilatus</i>  | 1 | f | EM 092 | South Africa | <i>Cx. pipiens</i>     | 97,8     | <i>Cx. trifilatus</i>  | 99,84 - 97,46 | 638      | LC669950 | NA | NA |
| 93  | SA 059       | e1 | 6 | <i>Cx. trifilatus</i>  | 1 | f | EM 093 | South Africa | <i>Cx. pipiens</i>     | 97,77    | <i>Cx. trifilatus</i>  | 99,84 - 97,44 | 629      | LC669951 | NA | NA |
| 94  | GAU104       | f  | 6 | <i>Cx. univittatus</i> | 1 | m | EM 094 | South Africa | <i>Cx. univittatus</i> | 99,84    | <i>Cx. univittatus</i> | 99,84 - 95,86 | 629      | LC669952 | NA | NA |
| 95  | PTH 002      | a  | 1 | <i>Cx. perexiguus</i>  | 1 | m | EM 095 | South Africa | <i>Cx. perexiguus</i>  | 100      | <i>Cx. perexiguus</i>  | 100 - 100     | 628      | LC670092 | NA | NA |
| 96  | PTH 003      | a  | 5 | <i>Cx. perexiguus</i>  | 1 | m | EM 096 | South Africa | <i>Cx. perexiguus</i>  | 100      | <i>Cx. perexiguus</i>  | 100 - 99,84   | 629      | LC670093 | NA | NA |
| 97  | KRU045       | c  | 1 | <i>Cx. perexiguus</i>  | 1 | f | EM 097 | South Africa | <i>Cx. perexiguus</i>  | 100      | <i>Cx. perexiguus</i>  | 100 - 99,84   | 629      | LC669953 | NA | NA |
| 98  | KRU045       | c  | 2 | <i>Cx. perexiguus</i>  | 1 | f | EM 098 | South Africa | <i>Cx. perexiguus</i>  | 100      | <i>Cx. perexiguus</i>  | 100 - 100     | 635      | LC669954 | NA | NA |
| 99  | MAR25<br>2   | k  |   | <i>Ae. mcintoshi</i>   | 1 | m | EM 099 | South Africa | Negative               | Negative | Negative               | Negative      | Negative | Negative | NA | NA |
| 100 | LAP238       | t  |   | <i>Ae. mcintoshi</i>   | 1 | m | EM 100 | South Africa | <i>Ae. mcintoshi</i>   | 99,22    | <i>Ae. mcintoshi</i>   | 99,52 - 94,63 | 637      | LC669955 | NA | NA |

|     |         |    |    |                       |   |   |        |              |                             |          |                             |               |          |          |    |    |
|-----|---------|----|----|-----------------------|---|---|--------|--------------|-----------------------------|----------|-----------------------------|---------------|----------|----------|----|----|
| 101 | MAR260  | g  | 15 | <i>Ae. mcintoshi</i>  | 1 | m | EM 101 | South Africa | <i>Ae. mcintoshi</i>        | 99,84    | <i>Ae. mcintoshi</i>        | 99,84 - 94,36 | 625      | LC669956 | NA | NA |
| 102 | LAP244  | h  |    | <i>Ae. mcintoshi</i>  | 1 | f | EM 102 | South Africa | <i>Ae. mcintoshi</i>        | 98,74    | <i>Ae. mcintoshi</i>        | 98,74 - 94    | 637      | LC669957 | NA | NA |
| 103 | GAU104  | k  |    | <i>Ae. mcintoshi</i>  | 1 | f | EM 103 | South Africa | <i>Ae. mcintoshi</i>        | 100      | <i>Ae. mcintoshi</i>        | 100 - 94,47   | 637      | LC669958 | NA | NA |
| 104 | KRU049  | m  |    | <i>Ae. mcintoshi</i>  | 1 | f | EM 104 | South Africa | <i>Ae. mcintoshi</i>        | 100      | <i>Ae. mcintoshi</i>        | 100 - 94,65   | 639      | LC669959 | NA | NA |
| 105 | MZ119   | a2 | 1  | <i>Cx. annulioris</i> | 1 | m | EM 105 | Mozambique   | <i>Cx. annulioris</i>       | 99,58    | <i>Cx. annulioris</i>       | 99,58 - 94,58 | 481      | LC663978 | NA | NA |
| 106 | SA 062  | b  |    | <i>Cx. annulioris</i> | 1 | m | EM 106 | South Africa | <i>Cx. annulioris</i>       | 99,84    | <i>Cx. annulioris</i>       | 99,84 - 94,98 | 622      | LC669960 | NA | NA |
| 107 | KYA 436 | o  |    | <i>Cx. annulioris</i> | 1 | m | EM 107 | South Africa | <i>Cx. annulioris</i>       | 99,53    | <i>Cx. annulioris</i>       | 99,83 - 94,79 | 637      | LC670087 | NA | NA |
| 108 | LAP286  | e  |    | <i>Cx. annulioris</i> | 1 | f | EM 108 | South Africa | <i>Cx. annulioris</i>       | 99,84    | <i>Cx. annulioris</i>       | 99,84 - 95,03 | 629      | LC670107 | NA | NA |
| 109 | GAU088  | d  |    | <i>Cx. annulioris</i> | 1 | f | EM 109 | South Africa | <i>Cx. annulioris</i>       | 99,69    | <i>Cx. annulioris</i>       | 99,68 - 94,92 | 635      | LC669961 | NA | NA |
| 110 | MZ114   | b2 | 1  | <i>Cx. nebulosus</i>  | 1 | m | EM 110 | Mozambique   | Negative                    | Negative | Negative                    | Negative      | Negative | Negative | NA | NA |
| 111 | MZ121   | b2 | 1  | <i>Cx. cinereus</i>   | 1 | m | EM 111 | Mozambique   | <i>Cx. nebulosus</i>        | 100      | <i>Cx. nebulosus</i>        | 100 - 93,27   | 627      | LC663983 | NA | NA |
| 112 | MZ115   | b5 | 2  | <i>Cx. nebulosus</i>  | 1 | m | EM 112 | Mozambique   | <i>Cx. sp. 16GH</i>         | 98,89    | <i>Cx. nebulosus</i>        | 99,84 - 92,95 | 628      | LC663992 | NA | NA |
| 113 | SA 059  | b  | 1  | <i>Cx. nebulosus</i>  | 1 | f | EM 113 | South Africa | <i>Cx. sp. 16GH</i>         | 99,04    | <i>Cx. nebulosus</i>        | 100 - 93,11   | 628      | LC669962 | NA | NA |
| 114 | SA 059  | b  | 2  | <i>Cx. nebulosus</i>  | 1 | f | EM 114 | South Africa | Negative                    | Negative | Negative                    | Negative      | Negative | Negative | NA | NA |
| 115 | SA 059  | b  | 3  | <i>Cx. nebulosus</i>  | 1 | f | EM 115 | South Africa | <i>Cx. sp. 16GH</i>         | 99,04    | <i>Cx. nebulosus</i>        | 99,68 - 93,16 | 626      | LC669963 | NA | NA |
| 116 | PTH 010 |    |    | <i>Cx. telesilla</i>  | 1 | m | EM 116 | South Africa | Negative                    | Negative | Negative                    | Negative      | Negative | Negative | NA | NA |
| 117 | PTH 006 | a  | 1  | <i>Cx. telesilla</i>  | 1 | m | EM 117 | South Africa | <i>Cx. watti</i>            | 97,49    | <i>Cx. MBI-18</i>           | 100 - 97,79   | 637      | LC670094 | NA | NA |
| 118 | PTH 003 | a  | 2  | <i>Cx. telesilla</i>  | 1 | m | EM 118 | South Africa | Negative                    | Negative | Negative                    | Negative      | Negative | Negative | NA | NA |
| 119 | PTH 003 | a  | 7  | <i>Cx. telesilla</i>  | 1 | m | EM 119 | South Africa | <i>Cx. watti</i>            | 97,61    | <i>Cx. MBI-18</i>           | 99,84 - 98    | 628      | LC670095 | NA | NA |
| 120 | PTH 006 | a  | 2  | <i>Cx. telesilla</i>  | 1 | m | EM 120 | South Africa | <i>Cx. watti</i>            | 97,49    | <i>Cx. MBI-18</i>           | 99,84 - 97,79 | 637      | LC670096 | NA | NA |
| 121 | PTH 003 | a  | 11 | <i>Cx. telesilla</i>  | 1 | m | EM 121 | South Africa | <i>Cx. watti</i>            | 97,61    | <i>Cx. MBI-18</i>           | 100 - 98      | 628      | LC670097 | NA | NA |
| 122 | MZ007   | m  | 1  | <i>Cx. ethiopicus</i> | 1 | m | EM 122 | Mozambique   | Negative                    | Negative | Negative                    | Negative      | Negative | Negative | NA | NA |
| 123 | MAR215  | e  |    | <i>Cx. ethiopicus</i> | 1 | m | EM 123 | South Africa | Negative                    | Negative | Negative                    | Negative      | Negative | Negative | NA | NA |
| 124 | LAP232  | t  |    | <i>Cx. ethiopicus</i> | 1 | m | EM 124 | South Africa | <i>Cx. bitaeniorhynchus</i> | 100      | <i>Cx. bitaeniorhynchus</i> | 100 - 95,03   | 629      | LC669964 | NA | NA |
| 125 | MZ003   | j  | 1  | <i>Cx. annulioris</i> | 1 | f | EM 125 | Mozambique   | <i>Cx. annulioris</i>       | 99,69    | <i>Cx. annulioris</i>       | 99,68 - 94,61 | 637      | LC663979 | NA | NA |
| 126 | MAR264  | l  |    | <i>Cx. ethiopicus</i> | 1 | f | EM 126 | South Africa | Negative                    | Negative | Negative                    | Negative      | Negative | Negative | NA | NA |

|     |              |    |   |                             |   |   |        |              |                             |          |                               |               |          |          |    |    |
|-----|--------------|----|---|-----------------------------|---|---|--------|--------------|-----------------------------|----------|-------------------------------|---------------|----------|----------|----|----|
| 127 | LAP237       | w  |   | <i>Cx. annulioris</i>       | 1 | f | EM 127 | South Africa | <i>Cx. annulioris</i>       | 99,52    | <i>Cx. annulioris</i>         | 100 - 94,85   | 626      | LC669965 | NA | NA |
| 128 | PTH 004      | a  | 1 | <i>Ae. circumluteolus</i>   | 1 | m | EM 128 | South Africa | <i>Ae. mcintoshi</i>        | 100      | <i>Ae. mcintoshi</i>          | 100 - 94,31   | 636      | LC670098 | NA | NA |
| 129 | PTH 011      |    |   | <i>Ae. circumluteolus</i>   | 1 | m | EM 129 | South Africa | <i>Ae. mcintoshi</i>        | 98,73    | <i>Ae. mcintoshi</i>          | 99,20 - 94,39 | 629      | LC670099 | NA | NA |
| 130 | PTH 004      | a  | 9 | <i>Ae. circumluteolus</i>   | 1 | m | EM 130 | South Africa | <i>Ae. mcintoshi</i>        | 99,84    | <i>Ae. mcintoshi</i>          | 99,84 - 94,15 | 637      | LC670100 | NA | NA |
| 131 | MZ002        | a  | 1 | <i>Ae. circumluteolus</i>   | 1 | f | EM 131 | Mozambique   | <i>Ae. mcintoshi</i>        | 99,68    | <i>Ae. mcintoshi</i>          | 99,84 - 94,23 | 628      | LC662756 | NA | NA |
| 132 | MZ056        | g1 | 1 | <i>Ae. circumluteolus</i>   | 1 | f | EM 132 | Mozambique   | <i>Ae. mcintoshi</i>        | 99,68    | <i>Ae. mcintoshi</i>          | 99,68 - 94,23 | 634      | LC662757 | NA | NA |
| 133 | PTH 004      | a  | 4 | <i>Ae. circumluteolus</i>   | 1 | m | EM 133 | South Africa | <i>Ae. mcintoshi</i>        | 99,8     | <i>Ae. mcintoshi</i>          | 99,80 - 94,07 | 489      | LC670101 | NA | NA |
| 134 | MZ011        | o  | 1 | <i>Ae. fowleri</i>          | 1 | f | EM 134 | Mozambique   | <i>Ae. hirsutus</i>         | 99,68    | <i>Ae. fowleri</i>            | 99,84 - 99,35 | 620      | LC662758 | NA | NA |
| 135 | MZ022        | w  | 2 | <i>Ae. fowleri</i>          | 1 | f | EM 135 | Mozambique   | <i>Ae. hirsutus</i>         | 99,69    | <i>Ae. fowleri</i>            | 99,84 - 99,37 | 637      | LC662759 | NA | NA |
| 136 | MZ022        | w  | 4 | <i>Ae. mcintoshi</i>        | 1 | f | EM 136 | Mozambique   | <i>Ae. mcintoshi</i>        | 99,64    | <i>Ae. mcintoshi</i>          | 99,84 - 94,13 | 635      | LC662760 | NA | NA |
| 137 | PTH 015      |    |   | <i>Ae. fowleri</i>          | 1 | m | EM 137 | South Africa | <i>Ae. hirsutus</i>         | 100      | <i>Ae. hirsutus</i>           | 100 - 99,56   | 457      | LC670102 | NA | NA |
| 138 | LAP 721      | h  | 2 | <i>Ae. fowleri</i>          | 1 | m | EM 138 | South Africa | <i>Ae. hirsutus</i>         | 99,84    | <i>Ae. fowleri</i>            | 100 - 99,52   | 625      | LC669966 | NA | NA |
| 139 | MZ118        | a2 | 1 | <i>Cx. duttoni</i>          | 1 | m | EM 139 | Mozambique   | <i>Cx. duttoni</i>          | 100      | <i>Cx. duttoni</i>            | 100 - 94,48   | 455      | LC663984 | NA | NA |
| 140 | LAP238       | s  | 2 | <i>Cx. duttoni</i>          | 1 | m | EM 140 | South Africa | <i>Cx. duttoni</i>          | 99,68    | <i>Cx. duttoni</i>            | 99,84 - 94,53 | 629      | LC669967 | NA | NA |
| 141 | KRU047       | a  |   | <i>Cx. duttoni</i>          | 1 | m | EM 141 | South Africa | <i>Cx. duttoni</i>          | 100      | <i>Cx. duttoni</i>            | 100 - 94,59   | 636      | LC669968 | NA | NA |
| 142 | LAP233       | t  |   | <i>Cx. inconspicuus</i>     | 1 | m | EM 142 | South Africa | <i>Cx. okinawae</i>         | 91,22    | <i>Ae. argente-opunctatus</i> | 99,05 - 89,57 | 637      | LC669969 | NA | NA |
| 143 | MAR26<br>1   | z  |   | <i>Cx. inconspicuus</i>     | 1 | m | EM 143 | South Africa | <i>Cx. okinawae</i>         | 91,11    | <i>Ae. argente-opunctatus</i> | 99,04 - 89,58 | 628      | LC669970 | NA | NA |
| 144 | LAP232       | x  | 2 | <i>Mi. mimomyia-formis</i>  | 1 | m | EM 144 | South Africa | <i>Mi. mimomyiaformis</i>   | 99,06    | <i>Mi. mimomyia-formis</i>    | 99,28 - 90,52 | 637      | LC669971 | NA | NA |
| 145 | LAP281       | j  |   | <i>Cx. duttoni</i>          | 1 | f | EM 145 | South Africa | <i>Cx. duttoni</i>          | 99,75    | <i>Cx. duttoni</i>            | 99,50 - 93,73 | 403      | LC669972 | NA | NA |
| 146 | LAP252       | e  |   | <i>Ae. capensis</i>         | 1 | m | EM 146 | South Africa | <i>Ae. argenteopunctata</i> | 90,17    | -                             | -             | 519      | LC669973 | NA | NA |
| 147 | LAP230       | m  |   | <i>Ae. quasiunivittatus</i> | 1 | m | EM 147 | South Africa | <i>Ae. quasiunivittatus</i> | 98,58    | <i>Ae. quasiunivittatus</i>   | 98,58 - 91,96 | 636      | LC669974 | NA | NA |
| 148 | LAP289       | m  | 2 | <i>Ae. quasiunivittatus</i> | 1 | m | EM 148 | South Africa | <i>Ae. quasiunivittatus</i> | 99,69    | <i>Ae. quasiunivittatus</i>   | 99,68 - 92,22 | 635      | LC669975 | NA | NA |
| 149 | LAP300<br>pa | f  |   | <i>Ae. quasiunivittatus</i> | 1 | f | EM 149 | South Africa | <i>Ae. quasiunivittatus</i> | 96,69    | -                             | -             | 635      | LC669976 | NA | NA |
| 150 | LAP307<br>pa | f  |   | <i>Ae. quasiunivittatus</i> | 1 | f | EM 150 | South Africa | Negative                    | Negative | Negative                      | Negative      | Negative | Negative | NA | NA |
| 151 | LAP308<br>pa | g  |   | <i>Ae. quasiunivittatus</i> | 1 | f | EM 151 | South Africa | <i>Ae. quasiunivittatus</i> | 96,86    | -                             | -             | 636      | LC669977 | NA | NA |

|     |           |       |    |                              |   |   |        |              |                                       |          |                              |               |          |          |    |    |
|-----|-----------|-------|----|------------------------------|---|---|--------|--------------|---------------------------------------|----------|------------------------------|---------------|----------|----------|----|----|
| 152 | MZ056     | g1    | 23 | <i>Cx. infula</i>            | 1 | m | EM 152 | Mozambique   | <i>Cx. bitaeniorhynchus</i>           | 99,84    | <i>Cx. bitaeniorhynchus</i>  | 100 - 94,97   | 628      | LC663985 | NA | NA |
| 153 | MZ011     | aa    | 1  | <i>Ae. mucidus</i>           | 1 | m | EM 153 | Mozambique   | <i>Ae. sudanensis</i>                 | 91,97    | -                            | -             | 635      | LC662761 | NA | NA |
| 154 | LAP285    | i     | 2  | <i>Ae. sudanensis</i>        | 1 | f | EM 154 | South Africa | <i>Ae. scatophagoides</i>             | 99,33    | <i>Ae. sudanensis</i>        | 99,09 - 90,25 | 446      | LC669978 | NA | NA |
| 155 | LAP285    | i     | 1  | <i>Ae. sudanensis</i>        | 1 | f | EM 155 | South Africa | <i>Ae. scatophagoides</i>             | 99,81    | <i>Ae. sudanensis</i>        | 99,61 - 90,82 | 516      | LC669979 | NA | NA |
| 156 | LAP248    | e2    |    | <i>Cx. sitiens</i>           | 1 | f | EM 156 | South Africa | Negative                              | Negative | Negative                     | Negative      | Negative | Negative | NA | NA |
| 157 | KZN 210   | a     |    | <i>Cx. tritaeniorhynchus</i> | 1 | m | EM 157 | South Africa | <i>Cx. tritaeniorhynchus</i>          | 99,38    | <i>Cx. tritaeniorhynchus</i> | 100 - 99,51   | 643      | LC669980 | NA | NA |
| 158 | KYA 243   | E     |    | <i>Ae. dentatus</i>          | 1 | m | EM 158 | South Africa | <i>Ae. vexans</i>                     | 93,32    | -                            | -             | 661      | LC669981 | NA | NA |
| 159 | LAP238    | y     | 2  | <i>Cx. argenteopunctatus</i> | 1 | m | EM 159 | South Africa | <i>Cx. argenteopunctatus</i>          | 97,08    | -                            | -             | 514      | LC669982 | NA | NA |
| 160 | SA 087    | c     |    | <i>Cx. simpsoni</i>          | 1 | f | EM 160 | South Africa | <i>Cx. sinaiticus</i>                 | 100      | <i>Cx. sinaiticus</i>        | 100 - 92,94   | 516      | LC669983 | NA | NA |
| 161 | LAP303 pa | i     |    | <i>Ae. fascipalpis</i>       | 1 | m | EM 161 | South Africa | <i>Ae. togoi</i>                      | 88,84    | -                            | -             | 439      | LC669984 | NA | NA |
| 162 | KRU 159   | e     |    | <i>Ae. fascipalpis</i>       | 1 | m | EM 162 | South Africa | <i>Ae. fascipalpis</i>                | 99,68    | -                            | -             | 629      | LC669985 | NA | NA |
| 163 | LAP235    | s     |    | <i>Ae. furcifer</i>          | 1 | m | EM 163 | South Africa | <i>Ae. furcifer</i>                   | 99,21    | -                            | -             | 630      | LC669986 | NA | NA |
| 164 | RPT 022   | a     | 1  | <i>Ae. caballus</i>          | 1 | m | EM 164 | South Africa | <i>Ae. caballus</i>                   | 96,16    | -                            | -             | 625      | LC669987 | NA | NA |
| 165 | RPT 022   | a     | 2  | <i>Ae. caballus</i>          | 1 | m | EM 165 | South Africa | <i>Ae. caballus</i>                   | 96,18    | -                            | -             | 628      | LC669988 | NA | NA |
| 166 | KRU 169   | c     | 3  | <i>Ae. hirsutus</i>          | 1 | m | EM 166 | South Africa | Negative                              | Negative | Negative                     | Negative      | Negative | Negative | NA | NA |
| 167 | LAP291    | j     |    | <i>Ae. cumminsii</i>         | 1 | f | EM 167 | South Africa | <i>Ae. cumminsii</i>                  | 99,59    | <i>Ae. dentatus</i>          | 99,59 - 94,68 | 490      | LC669989 | NA | NA |
| 168 | GAU107    | k     |    | <i>Ae. dentatus</i>          | 1 | f | EM 168 | South Africa | <i>Ae. pachyurus</i>                  | 97,11    | -                            | -             | 484      | LC669990 | NA | NA |
| 169 | KRU049    | l     |    | <i>Ae. cumminsii</i>         | 1 | f | EM 169 | South Africa | <i>Ae. (Stegomyia) sp. KNP17MP639</i> | 99,42    | <i>Ae. vexans</i>            | 99,42 - 95,44 | 521      | LC670108 | NA | NA |
| 170 | GAU103    | ak-an |    | <i>Ae. dentatus</i>          | 1 | f | EM 170 | South Africa | <i>Ae. vexans</i>                     | 93,44    | -                            | -             | 519      | LC669991 | NA | NA |
| 171 | GAU118    | t3    |    | <i>Ae. dentatus</i>          | 1 | f | EM 171 | South Africa | Negative                              | Negative | Negative                     | Negative      | Negative | Negative | NA | NA |
| 172 | GAU118    | t4    |    | <i>Ae. dentatus</i>          | 1 | f | EM 172 | South Africa | <i>Ae. vexans</i>                     | 93,79    | -                            | -             | 613      | LC670109 | NA | NA |
| 173 | GAU117    | v     | 2  | <i>Ae. dentatus</i>          | 1 | m | EM 173 | South Africa | Negative                              | Negative | Negative                     | Negative      | Negative | Negative | NA | NA |
| 174 | KZN 012   | g     | 3  | <i>Ae. durbanensis</i>       | 1 | m | EM 174 | South Africa | <i>Ae. vexans</i>                     | 93,56    | <i>Cx. tritaeniorhynchus</i> | 99,51 - 93,23 | 621      | LC670088 | NA | NA |
| 175 | KZN 019   | e     |    | <i>Ae. durbanensis</i>       | 1 | m | EM 175 | South Africa | <i>Ae. vexans</i>                     | 94,01    | <i>Cx. tritaeniorhynchus</i> | 99,84 - 93,81 | 634      | LC669992 | NA | NA |
| 176 | KZN 012   | g     | 4  | <i>Ae. durbanensis</i>       | 1 | m | EM 176 | South Africa | <i>Ae. vexans</i>                     | 93,83    | <i>Cx. tritaeniorhynchus</i> | 99,68 - 93,62 | 632      | LC670089 | NA | NA |

|     |          |   |   |                            |   |   |        |              |                          |          |                         |               |          |          |    |    |
|-----|----------|---|---|----------------------------|---|---|--------|--------------|--------------------------|----------|-------------------------|---------------|----------|----------|----|----|
| 177 | GAU104   | o | 1 | <i>Ae. eritreae</i>        | 1 | f | EM 177 | South Africa | <i>Ae. dalzieli</i>      | 93,54    | -                       | -             | 635      | LC669993 | NA | NA |
| 178 | KYA081   | g |   | <i>Ae. eritreae</i>        | 1 | f | EM 178 | South Africa | <i>Ae. alboventralis</i> | 93,56    | -                       | -             | 637      | LC669994 | NA | NA |
| 179 | GAU104   | o | 2 | <i>Ae. eritreae</i>        | 1 | f | EM 179 | South Africa | <i>Ae. dalzieli</i>      | 93,41    | -                       | -             | 637      | LC669995 | NA | NA |
| 180 | GAU104   | p |   | <i>Ae. eritreae</i>        | 1 | m | EM 180 | South Africa | <i>Ae. dalzieli</i>      | 93,54    | -                       | -             | 635      | LC669996 | NA | NA |
| 181 | GAU117   | v | 1 | <i>Ae. mcintoshi</i>       | 1 | m | EM 181 | South Africa | <i>Ae. mcintoshi</i>     | 98,9     | <i>Ae. mcintoshi</i>    | 98,89 - 94,60 | 635      | LC669997 | NA | NA |
| 182 | MAR260   | g | 1 | <i>Ae. mcintoshi</i>       | 1 | m | EM 182 | South Africa | Negative                 | Negative | Negative                | Negative      | Negative | Negative | NA | NA |
| 183 | MAR273   | i | 2 | <i>Ae. mcintoshi</i>       | 1 | m | EM 183 | South Africa | <i>Ae. mcintoshi</i>     | 99,53    | <i>Ae. mcintoshi</i>    | 99,53 - 94,31 | 636      | LC669998 | NA | NA |
| 184 | LAP308pa | h |   | <i>Ae. mcintoshi</i>       | 1 | m | EM 184 | South Africa | Negative                 | Negative | Negative                | Negative      | Negative | Negative | NA | NA |
| 185 | LAP235   | t | 2 | <i>Ae. mcintoshi</i>       | 1 | m | EM 185 | South Africa | <i>Ae. mcintoshi</i>     | 99,06    | <i>Ae. mcintoshi</i>    | 99,21 - 94,47 | 637      | LC669999 | NA | NA |
| 186 | LAP306pa | b |   | <i>Ae. mcintoshi</i>       | 1 | m | EM 186 | South Africa | Negative                 | Negative | Negative                | Negative      | Negative | Negative | NA | NA |
| 187 | GAU104   | n | 1 | <i>Ae. dentatus</i>        | 1 | f | EM 187 | South Africa | <i>Ae. vexans</i>        | 93,87    | <i>Ae. dentatus</i>     | 97,25 - 93,53 | 621      | LC670000 | NA | NA |
| 188 | GAU104   | n | 2 | <i>Ae. dentatus</i>        | 1 | f | EM 188 | South Africa | Negative                 | Negative | Negative                | Negative      | Negative | Negative | NA | NA |
| 189 | KYA081   | f |   | <i>Ae. dentatus</i>        | 1 | f | EM 189 | South Africa | <i>Ae. vexans</i>        | 94,01    | <i>Ae. dentatus</i>     | 97,30 - 94,11 | 635      | LC670001 | NA | NA |
| 190 | KYA082   | g |   | <i>Ae. dentatus</i>        | 1 | f | EM 190 | South Africa | <i>Ae. sp</i>            | 95,64    | <i>Ae. dentatus</i>     | 97,28 - 94,22 | 627      | LC670002 | NA | NA |
| 191 | GAU104   | b |   | <i>Cx. andersoni</i>       | 1 | f | EM 191 | South Africa | <i>Cx. theileri</i>      | 96,79    | -                       | -             | 629      | LC670110 | NA | NA |
| 192 | GAU118   | l |   | <i>Cx. andersoni</i>       | 1 | f | EM 192 | South Africa | <i>Cx. theileri</i>      | 96,69    | -                       | -             | 635      | LC670003 | NA | NA |
| 193 | SA 086   | a |   | <i>Cx. theileri</i>        | 1 | f | EM 193 | South Africa | <i>Cx. theileri</i>      | 99,36    | <i>Cx. theileri</i>     | 100 - 99,18   | 629      | LC670004 | NA | NA |
| 194 | GAU117   | y |   | <i>Cx. andersoni</i>       | 1 | f | EM 195 | South Africa | <i>Cx. theileri</i>      | 96,36    | -                       | -             | 629      | LC670111 | NA | NA |
| 195 | LAP230   | n | 2 | <i>Mi. mimomyia-formis</i> | 1 | m | EM 196 | South Africa | Negative                 | Negative | Negative                | Negative      | Negative | Negative | NA | NA |
| 196 | LAP 772  | j |   | <i>Mi. mimomyia-formis</i> | 1 | m | EM 197 | South Africa | Negative                 | Negative | Negative                | Negative      | Negative | Negative | NA | NA |
| 197 | KRU 168  | f | 1 | <i>Ae. vittatus</i>        | 1 | m | EM 198 | South Africa | <i>Ae. vittatus</i>      | 99,68    | <i>Ae. vittatus</i>     | 99,68 - 94,26 | 632      | LC670005 | NA | NA |
| 198 | MAR 714  | g | 1 | <i>Ae. hirsutus</i>        | 1 | m | EM 199 | South Africa | <i>Ae. hirsutus</i>      | 99,59    | <i>Ae. hirsutus</i>     | 97,71 - 94,81 | 501      | LC670006 | NA | NA |
| 199 | PTH 005  |   |   | <i>Ae. minutus</i>         | 1 | m | EM 200 | South Africa | Negative                 | Negative | Negative                | Negative      | Negative | Negative | NA | NA |
| 200 | LAP290   | j | 2 | <i>Cq. fuscopennata</i>    | 1 | m | EM 201 | South Africa | <i>Cq. fuscopennata</i>  | 98,51    | <i>Cq. aurites</i>      | 98,76 - 88,47 | 402      | LC670007 | NA | NA |
| 201 | LAP272   | q |   | <i>Cq. fuscopennata</i>    | 1 | m | EM 202 | South Africa | <i>Cq. fuscopennata</i>  | 99,06    | <i>Cq. fuscopennata</i> | 99,05 - 89,15 | 635      | LC670008 | NA | NA |

|     |              |    |    |                                  |   |   |        |              |                           |          |                                 |               |          |          |    |    |
|-----|--------------|----|----|----------------------------------|---|---|--------|--------------|---------------------------|----------|---------------------------------|---------------|----------|----------|----|----|
| 202 | LAP283       | k  | 2  | <i>Cq. fuscopennata</i>          | 1 | m | EM 203 | South Africa | <i>Cq. fuscopennata</i>   | 98,9     | <i>Cq. fuscopennata</i>         | 98,89 - 89,21 | 635      | LC670009 | NA | NA |
| 203 | LAP303<br>pa | h  |    | <i>Cq. fuscopennata</i>          | 1 | m | EM 204 | South Africa | <i>Cq. fuscopennata</i>   | 98,5     | <i>Cq. aurites</i>              | 98,75 - 88,72 | 399      | LC670010 | NA | NA |
| 204 | LAP289       | n  | 2  | <i>Cq. fuscopennata</i>          | 1 | m | EM 205 | South Africa | <i>Cq. fuscopennata</i>   | 98,9     | <i>Cq. fuscopennata</i>         | 98,89 - 89,07 | 637      | LC670011 | NA | NA |
| 205 | MZ074        | a9 | 5  | <i>Ma. uniformis</i>             | 1 | f | EM 206 | Mozambique   | <i>Ma. uniformis</i>      | 99,84    | <i>Ma. uniformis</i>            | 99,84 - 96,61 | 633      | LC664018 | NA | NA |
| 206 | MZ074        | a9 | 10 | <i>Ma. uniformis</i>             | 1 | f | EM 207 | Mozambique   | Negative                  | Negative | Negative                        | Negative      | Negative | Negative | NA | NA |
| 207 | MZ011        | ae |    | <i>Ma. uniformis</i>             | 1 | f | EM 208 | Mozambique   | Negative                  | Negative | Negative                        | Negative      | Negative | Negative | NA | NA |
| 208 | MAR22<br>5   | d  |    | <i>Ma. uniformis</i>             | 1 | m | EM 209 | South Africa | <i>Ma. uniformis</i>      | 99,8     | <i>Ma. uniformis</i>            | 99,80 - 96,67 | 512      | LC670012 | NA | NA |
| 209 | MPA<br>005   | J  |    | <i>Ma. uniformis</i>             | 1 | m | EM 210 | South Africa | <i>Ma. uniformis</i>      | 99,68    | <i>Ma. uniformis</i>            | 100 - 96,49   | 633      | LC670013 | NA | NA |
| 210 | MZ011        | m  | 4  | <i>Ma. africana</i>              | 1 | m | EM 211 | Mozambique   | <i>Ma. africana</i>       | 99,8     | <i>Ma. africana</i>             | 99,80 - 97,05 | 492      | LC664017 | NA | NA |
| 211 | LAP252       | f  |    | <i>Ur. mashonensis</i>           | 1 | m | EM 212 | South Africa | <i>Cx. pipiens</i>        | 89,06    | -                               | -             | 457      | LC670014 | NA | NA |
| 212 | LAP238       | af |    | <i>Ur. mashonensis</i>           | 1 | m | EM 213 | South Africa | <i>Cx. pipiens</i>        | 89,56    | -                               | -             | 633      | LC670015 | NA | NA |
| 213 | LAP272       | u  |    | <i>Ur. alboabdomi-<br/>nalis</i> | 1 | m | EM 214 | South Africa | <i>Ur. bilineata</i>      | 89,18    | -                               | -             | 635      | LC670016 | NA | NA |
| 214 | LAP237       | aa | 2  | <i>Ur. alboabdomi-<br/>nalis</i> | 1 | f | EM 215 | South Africa | <i>Ur. bilineata</i>      | 89,18    | -                               | -             | 635      | LC670017 | NA | NA |
| 215 | LAP237       | aa | 3  | <i>Ur. alboabdomi-<br/>nalis</i> | 1 | f | EM 216 | South Africa | <i>Ur. bilineata</i>      | 89,03    | -                               | -             | 635      | LC670018 | NA | NA |
| 216 | LAP237       | aa | 4  | <i>Ur. alboabdomi-<br/>nalis</i> | 1 | f | EM 217 | South Africa | <i>Ur. bilineata</i>      | 89,03    | -                               | -             | 635      | LC670019 | NA | NA |
| 217 | LAP237       | y  | 2  | <i>Cq. fuscopennata</i>          | 1 | f | EM 218 | South Africa | <i>Cq. fuscopennata</i>   | 98,74    | <i>Cq. aurites</i>              | 99,05 - 89,15 | 635      | LC670020 | NA | NA |
| 218 | LAP307<br>pa | g  |    | <i>Cq. fuscopennata</i>          | 1 | f | EM 219 | South Africa | <i>Cq. fuscopennata</i>   | 98,74    | <i>Cq. fuscopennata</i>         | 98,73 - 89,33 | 635      | LC670021 | NA | NA |
| 219 | LAP291       | o  | 2  | <i>Cq. fuscopennata</i>          | 1 | f | EM 220 | South Africa | Negative                  | Negative | Negative                        | Negative      | Negative | Negative | NA | NA |
| 220 | GAU104       | j  | 2  | <i>Ae. simpsoni</i>              | 1 | f | EM 221 | South Africa | <i>Ae. simpsoni</i>       | 99,68    | <i>Ae. simpsoni</i>             | 99,68 - 92,34 | 632      | LC670022 | NA | NA |
| 221 | GAU105       | i  |    | <i>Ae. simpsoni</i>              | 1 | f | EM 222 | South Africa | <i>Ae. simpsoni</i>       | 99,69    | <i>Ae. simpsoni</i>             | 99,69 - 92,30 | 639      | LC670023 | NA | NA |
| 222 | KYA082       | i  | 2  | <i>Ae. simpsoni</i>              | 1 | f | EM 223 | South Africa | <i>Ae. simpsoni</i>       | 99,69    | <i>Ae. simpsoni</i>             | 99,68 - 92,34 | 637      | LC670024 | NA | NA |
| 223 | MZ007        | o  | 1  | <i>Ae. natronius</i>             | 1 | f | EM 224 | Mozambique   | <i>Ae. vexans</i>         | 94,59    | <i>Ae. natronius</i>            | 98,56 - 94,78 | 628      | LC662762 | NA | NA |
| 224 | MZ005        | m  | 1  | <i>Ae. natronius</i>             | 1 | f | EM 225 | Mozambique   | <i>Ae. vexans</i>         | 94,6     | <i>Ae. natronius</i>            | 98,56 - 94,81 | 630      | LC662763 | NA | NA |
| 225 | LAP232       | x  | 1  | <i>Mi. mimomyia-<br/>formis</i>  | 1 | m | EM 226 | South Africa | <i>Mi. mimomyiaformis</i> | 99,06    | <i>Mi. mimomyia-<br/>formis</i> | 99,28 - 90,52 | 637      | LC670025 | NA | NA |

|     |          |      |    |                              |   |   |        |              |                             |          |                              |               |          |          |    |    |
|-----|----------|------|----|------------------------------|---|---|--------|--------------|-----------------------------|----------|------------------------------|---------------|----------|----------|----|----|
| 226 | MAR228   | g    | 1  | <i>Mi. mimomyia-formis</i>   | 1 | m | EM 227 | South Africa | Negative                    | Negative | Negative                     | Negative      | Negative | Negative | NA | NA |
| 227 | MAR228   | g    | 2  | <i>Mi. mimomyia-formis</i>   | 1 | m | EM 228 | South Africa | Negative                    | Negative | Negative                     | Negative      | Negative | Negative | NA | NA |
| 228 | MAR219   |      | 2  | <i>Mi. mimomyia-formis</i>   | 1 | f | EM 230 | South Africa | <i>Mi. mimomyiaformis</i>   | 99,78    | <i>Mi. mimomyia-formis</i>   | 100 - 92      | 455      | LC670026 | NA | NA |
| 229 | LAP232   | g    |    | <i>Mi. mimomyia-formis</i>   | 1 | f | EM 231 | South Africa | <i>Mi. mimomyiaformis</i>   | 99,21    | <i>Mi. mimomyia-formis</i>   | 99,37 - 90,36 | 636      | LC670027 | NA | NA |
| 230 | LAP304pa | n    |    | <i>Mi. mimomyia-formis</i>   | 1 | f | EM 232 | South Africa | <i>Mi. mimomyiaformis</i>   | 99,06    | <i>Mi. mimomyia-formis</i>   | 99,28 - 90,52 | 636      | LC670028 | NA | NA |
| 231 | MAR220   | g1-2 | 2  | <i>Mi. mimomyia-formis</i>   | 1 | f | EM 233 | South Africa | Negative                    | Negative | Negative                     | Negative      | Negative | Negative | NA | NA |
| 232 | LAP238   | s    | 1  | <i>Ae. hirsutus</i>          | 1 | m | EM 234 | South Africa | <i>Ae. hirsutus</i>         | 98,24    | <i>Ae. hirsutus</i>          | 98,23 - 95,14 | 625      | LC670029 | NA | NA |
| 233 | LAP218   | h    |    | <i>Ae. hirsutus</i>          | 1 | f | EM 235 | South Africa | Negative                    | Negative | Negative                     | Negative      | Negative | Negative | NA | NA |
| 234 | MAR218   | j    | 2  | <i>Ae. hirsutus</i>          | 1 | f | EM 236 | South Africa | Negative                    | Negative | Negative                     | Negative      | Negative | Negative | NA | NA |
| 235 | KRU044   | h    |    | <i>Ae. hirsutus</i>          | 1 | f | EM 237 | South Africa | <i>Ae. hirsutus</i>         | 99,78    | <i>Ae. hirsutus</i>          | 97,81 - 94,74 | 457      | LC670030 | NA | NA |
| 236 | MAR252   | g    | 2  | <i>Ae. argenteopunctatus</i> | 1 | f | EM 238 | South Africa | <i>Ae. argenteopunctata</i> | 98,42    | <i>Ae. argenteopunctatus</i> | 99,52 - 98,09 | 631      | LC670031 | NA | NA |
| 237 | LAP232   | s    | 2  | <i>Mi. mimomyia-formis</i>   | 1 | m | EM 239 | South Africa | <i>Mi. mimomyiaformis</i>   | 98,9     | <i>Mi. mimomyia-formis</i>   | 99,09 - 90,32 | 635      | LC670032 | NA | NA |
| 238 | GAU091   | e    |    | <i>Cx. spp</i>               | 1 | f | EM 242 | South Africa | Negative                    | Negative | Negative                     | Negative      | Negative | Negative | NA | NA |
| 239 | KYA063   | c    |    | <i>Cx. spp</i>               | 1 | f | EM 243 | South Africa | Negative                    | Negative | Negative                     | Negative      | Negative | Negative | NA | NA |
| 240 | KYA068   | e    |    | <i>Cx. spp</i>               | 1 | f | EM 244 | South Africa | Negative                    | Negative | Negative                     | Negative      | Negative | Negative | NA | NA |
| 241 | MZ092    | g1   | 1  | <i>Ad. africana</i>          | 1 | m | EM 245 | Mozambique   | <i>Ad. africana</i>         | 100      | <i>Ad. africana</i>          | 100 - 89,13   | 629      | LC662529 | NA | NA |
| 242 | MZ092    | g1   | 5  | <i>Ad. africana</i>          | 1 | m | EM 246 | Mozambique   | <i>Ad. africana</i>         | 100      | <i>Ad. africana</i>          | 100 - 89,13   | 629      | LC662530 | NA | NA |
| 243 | MZ012    | j    | 13 | <i>Ad. africana</i>          | 1 | m | EM 247 | Mozambique   | <i>Ad. africana</i>         | 99,68    | <i>Ad. africana</i>          | 99,68 - 88,89 | 633      | LC662531 | NA | NA |
| 244 | MZ014    | j    | 1  | <i>Ad. africana</i>          | 1 | f | EM 248 | Mozambique   | <i>Ad. africana</i>         | 99,84    | <i>Ad. africana</i>          | 99,84 - 89,00 | 631      | LC662532 | NA | NA |
| 245 | KRU 153  | j    |    | <i>Ae. metallicus</i>        | 1 | m | EM 249 | South Africa | <i>Ae. metallicus</i>       | 92,88    | <i>Ae. sp</i>                | 97,47 - 89,95 | 632      | LC670033 | NA | NA |
| 246 | PTH 016  | a    | 1  | <i>Cq. chrysosoma</i>        | 1 | m | EM 250 | South Africa | <i>Cq. aurites</i>          | 99,84    | <i>Cq. fuscopennata</i>      | 100 - 87,93   | 628      | LC670103 | NA | NA |
| 247 | PTH 016  | a    | 2  | <i>Cq. chrysosoma</i>        | 1 | m | EM 251 | South Africa | <i>Cq. aurites</i>          | 99,84    | <i>Cq. fuscopennata</i>      | 100 - 87,93   | 629      | LC670104 | NA | NA |
| 248 | LAP263   | q    |    | <i>Fi. uniformis</i>         | 1 | m | EM 252 | South Africa | <i>Cx. pallidothorax</i>    | 90,88    | -                            | -             | 635      | LC670034 | NA | NA |
| 249 | MZ012    | l    | 1  | <i>Cq. metallica</i>         | 1 | m | EM 253 | Mozambique   | <i>Cq. metallica</i>        | 99,69    | <i>Cq. metallica</i>         | 100 - 88,16   | 636      | LC663977 | NA | NA |
| 250 | MZ114    | c2   | 1  | <i>Er. subsimplicipes</i>    | 1 | m | EM 254 | Mozambique   | <i>Er. intermedius</i>      | 95,56    | -                            | -             | 632      | LC664010 | NA | NA |

|     |        |    |   |                              |   |   |        |              |                                           |          |                              |               |          |          |    |    |
|-----|--------|----|---|------------------------------|---|---|--------|--------------|-------------------------------------------|----------|------------------------------|---------------|----------|----------|----|----|
| 251 | MZ114  | c2 | 4 | <i>Er. subsimplicipes</i>    | 1 | m | EM 255 | Mozambique   | <i>Er. intermedius</i>                    | 95,57    | -                            | -             | 633      | LC664011 | NA | NA |
| 252 | MZ114  | c2 | 3 | <i>Er. subsimplicipes</i>    | 1 | m | EM 256 | Mozambique   | <i>Er. intermedius</i>                    | 95,46    | -                            | -             | 507      | LC664012 | NA | NA |
| 253 | MZ007  | p  | 1 | <i>Ad. furfurea</i>          | 1 | f | EM 257 | Mozambique   | <i>Ad. furfurea</i>                       | 99,53    | <i>Ad. furfurea</i>          | 99,53 - 90,50 | 637      | LC662533 | NA | NA |
| 254 | KYA082 | a  | 2 | <i>Ad. furfurea</i>          | 1 | f | EM 258 | South Africa | <i>Ad. furfurea</i>                       | 100      | <i>Ad. furfurea</i>          | 100 - 90,99   | 637      | LC662534 | NA | NA |
| 255 | KYA083 | d  | 2 | <i>Ad. furfurea</i>          | 1 | f | EM 259 | South Africa | <i>Ad. furfurea</i>                       | 100      | <i>Ad. furfurea</i>          | 100 - 91,11   | 634      | LC662535 | NA | NA |
| 256 | MAR254 | n  | 2 | <i>Ae. argenteopunctatus</i> | 1 | f | EM 260 | South Africa | <i>Ae. argenteopunctata</i>               | 97,93    | <i>Ae. argenteopunctatus</i> | 99,36 - 97,60 | 628      | LC670035 | NA | NA |
| 257 | LAP289 | h  |   | <i>Ae. argenteopunctatus</i> | 1 | f | EM 261 | South Africa | <i>Ae. argenteopunctata</i>               | 97,93    | <i>Ae. argenteopunctatus</i> | 99,36 - 97,60 | 627      | LC670036 | NA | NA |
| 258 | KRU038 | e  |   | <i>Ae. haworthi</i>          | 1 | f | EM 262 | South Africa | <i>Ae. haworthi</i>                       | 99,8     | -                            | -             | 628      | LC670037 | NA | NA |
| 259 | KRU049 | p  |   | <i>Cx. thalassius</i>        | 1 | f | EM 263 | South Africa | <i>Cx. sitiens</i>                        | 96,86    | <i>Cx. thalassius</i>        | 97,16 - 96,52 | 636      | LC670038 | NA | NA |
| 260 | MAR264 | m  |   | <i>Ae. argenteopunctatus</i> | 1 | f | EM 264 | South Africa | <i>Ae. argenteopunctata</i>               | 98,11    | <i>Ae. argenteopunctatus</i> | 99,53 - 97,79 | 636      | LC670039 | NA | NA |
| 261 | LAP227 | b  |   | <i>Ae. microstictus</i>      | 1 | f | EM 265 | South Africa | <i>Ae. argenteopunctata</i>               | 98,11    | <i>Ae. argenteopunctatus</i> | 98,57 - 97,94 | 634      | LC670040 | NA | NA |
| 262 | LAP285 | h  |   | <i>Ae. ochraceus</i>         | 1 | f | EM 266 | South Africa | <i>Ae. ochraceus</i>                      | 99,68    | <i>Ae. ochraceus</i>         | 100 - 93,03   | 636      | LC670041 | NA | NA |
| 263 | MAR263 | j  | 1 | <i>Ae. caballus</i>          | 1 | f | EM 267 | South Africa | <i>Ae. caballus</i>                       | 96,38    | -                            | -             | 635      | LC670042 | NA | NA |
| 264 | MAR263 | j  | 2 | <i>Ae. caballus</i>          | 1 | f | EM 268 | South Africa | <i>Ae. caballus</i>                       | 96,34    | -                            | -             | 629      | LC670043 | NA | NA |
| 265 | MZ022  | z  | 1 | <i>Cx. tritaeniorhynchus</i> | 1 | f | EM 269 | Mozambique   | <i>Cx. tritaeniorhynchus</i>              | 99,21    | <i>Cx. tritaeniorhynchus</i> | 99,68 - 98,88 | 629      | LC664008 | NA | NA |
| 266 | MZ010  | a  | 1 | <i>Er. quinquevittatus</i>   | 1 | m | EM 270 | Mozambique   | <i>Cx. (Lophoceraomyia) sp. 3 HY-2020</i> | 90,73    | <i>Er. silvestris</i>        | 100 - 89,88   | 629      | LC664009 | NA | NA |
| 267 | LAP229 | u  |   | <i>Cx. spp</i>               | 1 | f | EM 271 | South Africa | Negative                                  | Negative | Negative                     | Negative      | Negative | Negative | NA | NA |
| 268 | MAR221 | g  | 2 | <i>Cx. perexiguus</i>        | 1 | m | EM 272 | South Africa | <i>Cx. perexiguus</i>                     | 99,84    | <i>Cx. neavei</i>            | 99,84 - 99,84 | 627      | LC670044 | NA | NA |
| 269 | LAP237 | x  | 1 | <i>Fi. uniformis</i>         | 1 | f | EM 273 | South Africa | Negative                                  | Negative | Negative                     | Negative      | Negative | Negative | NA | NA |
| 270 | LAP232 | z  |   | <i>Cx. univittatus</i>       | 1 | f | EM 274 | South Africa | <i>Cx. univittatus</i>                    | 99,8     | <i>Cx. univittatus</i>       | 100 - 95,63   | 494      | LC670045 | NA | NA |
| 271 | LAP232 | y  |   | <i>Cx. inconspicuus</i>      | 1 | m | EM 275 | South Africa | <i>Cx. okinawae</i>                       | 91,59    | <i>Ae. argenteopunctatus</i> | 99,2 - 89,97  | 628      | LC670046 | NA | NA |
| 272 | LAP237 | z  |   | <i>Mi. hispida</i>           | 1 | f | EM 276 | South Africa | <i>Mi. mimomyiaformis</i>                 | 91,67    | -                            | -             | 636      | LC670047 | NA | NA |
| 273 | LAP281 | l  |   | <i>Mi. hispida</i>           | 1 | m | EM 277 | South Africa | <i>Mi. mimomyiaformis</i>                 | 91,68    | -                            | -             | 637      | LC670048 | NA | NA |
| 274 | LAP249 | e  |   | <i>Mi. hispida</i>           | 1 | f | EM 278 | South Africa | <i>Mi. mimomyiaformis</i>                 | 91,68    | -                            | -             | 637      | LC670049 | NA | NA |

|     |         |     |   |                            |   |   |        |              |                             |          |                            |               |          |          |                    |                                            |
|-----|---------|-----|---|----------------------------|---|---|--------|--------------|-----------------------------|----------|----------------------------|---------------|----------|----------|--------------------|--------------------------------------------|
| 275 | LAP230  | n   | 1 | <i>Ur. mashonensis</i>     | 1 | m | EM 279 | South Africa | <i>Cx. inatomii</i>         | 90,03    | -                          | -             | 633      | LC670050 | NA                 | NA                                         |
| 276 | MAR230  | i   |   | <i>Mi. mimomyia-formis</i> | 1 | f | EM 280 | South Africa | Negative                    | Negative | Negative                   | Negative      | Negative | Negative | NA                 | NA                                         |
| 277 | MAR263  | k   |   | <i>Mi. mimomyia-formis</i> | 1 | f | EM 281 | South Africa | <i>Mi. mimomyiaformis</i>   | 100      | <i>Mi. mimomyia-formis</i> | 100 - 90,68   | 636      | LC670051 | NA                 | NA                                         |
| 278 | MAR230  | j   |   | <i>Mi. mimomyia-formis</i> | 1 | f | EM 282 | South Africa | Negative                    | Negative | Negative                   | Negative      | Negative | Negative | NA                 | NA                                         |
| 279 | MAR248  | u   |   | <i>Mi. mimomyia-formis</i> | 1 | m | EM 283 | South Africa | Negative                    | Negative | Negative                   | Negative      | Negative | Negative | NA                 | NA                                         |
| 280 | MAR228  | e   |   | <i>Mi. mediolineata</i>    | 1 | f | EM 284 | South Africa | Negative                    | Negative | Negative                   | Negative      | Negative | Negative | NA                 | NA                                         |
| 281 | MZ092   | i1  | 1 | <i>Ae. aegypti</i>         | 1 | f | EM 285 | Mozambique   | <i>Ae. aegypti</i>          | 100      | <i>Ae. aegypti</i>         | 100 - 99,37   | 633      | LC662764 | NA                 | NA                                         |
| 282 | MZ008   | a   | 1 | <i>Ae. metallicus</i>      | 1 | f | EM 286 | Mozambique   | <i>Ae. metallicus</i>       | 93,31    | <i>Ae. sp.</i>             | 98,83 - 90,38 | 629      | LC662765 | NA                 | NA                                         |
| 283 | LAP291  | k   |   | <i>Ae. metallicus</i>      | 1 | f | EM 288 | South Africa | <i>Ae. metallicus</i>       | 93,8     | <i>Ae. sp.</i>             | 98,25 - 90,54 | 629      | LC670052 | NA                 | NA                                         |
| 284 | MAR255  | k   |   | <i>Ae. metallicus</i>      | 1 | f | EM 289 | South Africa | <i>Ae. metallicus</i>       | 93,16    | -                          | -             | 629      | LC670053 | NA                 | NA                                         |
| 285 | MAR221  | g   | 3 | <i>Mi. mimomyia-formis</i> | 1 | m | EM 290 | South Africa | Negative                    | Negative | Negative                   | Negative      | Negative | Negative | NA                 | NA                                         |
| 286 | ANG 019 | c   |   | <i>Ae. aegypti</i>         | 1 | f | EM 291 | Angola       | <i>Ae. aegypti</i>          | 99,68    | <i>Ae. aegypti</i>         | 99,84 - 99,39 | 632      | LC670073 | NA                 | NA                                         |
| 287 | ANG 025 | d   |   | <i>Ae. aegypti</i>         | 1 | f | EM 292 | Angola       | Negative                    | Negative | Negative                   | Negative      | Negative | Negative | NA                 | NA                                         |
| 288 | ANG 024 | c   | 1 | <i>Ae. aegypti</i>         | 1 | m | EM 293 | Angola       | <i>Ae. aegypti</i>          | 99,53    | <i>Ae. aegypti</i>         | 100 - 99,20   | 632      | LC670074 | NA                 | NA                                         |
| 289 | ANG 025 | c   | 2 | <i>Ae. aegypti</i>         | 1 | m | EM 294 | Angola       | Negative                    | Negative | Negative                   | Negative      | Negative | Negative | NA                 | NA                                         |
| 290 | MZ117   | b2  | 1 | <i>Ae. aegypti</i>         | 1 | m | EM 295 | Mozambique   | Negative                    | Negative | Negative                   | Negative      | Negative | Negative | NA                 | NA                                         |
| 291 | MZ124   | HBI | 1 | <i>Ae. aegypti</i>         | 1 | m | EM 296 | Mozambique   | <i>Ae. aegypti</i>          | 100      | <i>Ae. aegypti</i>         | 100 - 99,68   | 629      | LC730079 | NA                 | NA                                         |
| 292 | MZ116   | a2  | 9 | <i>Ae. aegypti</i>         | 1 | m | EM 297 | Mozambique   | <i>Ae. aegypti</i>          | 99,84    | <i>Ae. aegypti</i>         | 100 - 99,59   | 632      | LC662766 | NA                 | NA                                         |
| 293 | PTH 019 | a   | 1 | <i>Ae. aegypti</i>         | 1 | m | EM 298 | South Africa | <i>Ae. aegypti</i>          | 100      | <i>Ae. aegypti</i>         | 100 - 99,31   | 631      | LC670105 | NA                 | NA                                         |
| 294 | PTH 019 | a   | 4 | <i>Ae. aegypti</i>         | 1 | m | EM 299 | South Africa | <i>Ae. aegypti</i>          | 100      | <i>Ae. aegypti</i>         | 100 - 99,52   | 629      | LC670106 | NA                 | NA                                         |
| 295 | MZ051   | e   | 1 | <i>Cx. pipiens</i>         | 1 | m | EM 300 | Mozambique   | <i>Cx. quinquefasciatus</i> | 100      | <i>Cx. pipiens</i>         | 100 - 100     | 480      | LC663995 | <i>Cx. pipiens</i> | Hybrid <i>pipiens</i> and <i>mo-lestus</i> |
| 296 | GAU107  | j   |   | <i>Cx. pipiens</i>         | 1 | m | EM 301 | South Africa | <i>Cx. quinquefasciatus</i> | 100      | <i>Cx. pipiens</i>         | 100 - 100     | 456      | LC670054 | NA                 | NA                                         |
| 297 | GAU117  | z   | 3 | <i>Cx. pipiens</i>         | 1 | m | EM 302 | South Africa | <i>Cx. pipiens</i>          | 99,36    | <i>Cx. pipiens</i>         | 99,36 - 98,83 | 628      | LC670055 | <i>Cx. pipiens</i> | Hybrid <i>pipiens</i> and <i>mo-lestus</i> |

|     |         |     |   |                                         |   |   |        |              |                             |          |                                         |               |          |          |                                         |                                                       |
|-----|---------|-----|---|-----------------------------------------|---|---|--------|--------------|-----------------------------|----------|-----------------------------------------|---------------|----------|----------|-----------------------------------------|-------------------------------------------------------|
| 298 | KYA064  | g   | 2 | <i>Cx. pipiens</i>                      | 1 | m | EM 303 | South Africa | <i>Cx. quinquefasciatus</i> | 100      | <i>Cx. pipiens</i>                      | 100 - 100     | 629      | LC670056 | <i>Cx. pipiens</i>                      | Hybrid <i>pipiens</i> and <i>mo-</i><br><i>lestus</i> |
| 299 | KYA082  | f   | 2 | <i>Cx. pipiens</i>                      | 1 | m | EM 304 | South Africa | <i>Cx. quinquefasciatus</i> | 100      | <i>Cx. pipiens</i>                      | 100 - 100     | 458      | LC670057 | <i>Cx. pipiens</i>                      | Hybrid <i>pipiens</i> and <i>mo-</i><br><i>lestus</i> |
| 300 | GAU117  | z   | 2 | <i>Cx. pipiens</i>                      | 1 | m | EM 305 | South Africa | <i>Cx. quinquefasciatus</i> | 100      | <i>Cx. pipiens</i>                      | 100 - 100     | 634      | LC670058 | <i>Cx. pipiens</i>                      | <i>pipiens</i>                                        |
| 301 | KYA071  | g   | 1 | <i>Cx. pipiens</i>                      | 1 | m | EM 306 | South Africa | <i>Cx. pipiens</i>          | 99,68    | <i>Cx. pipiens</i>                      | 99,68 - 97,47 | 629      | LC670059 | <i>Cx. pipiens</i>                      | Negative                                              |
| 302 | ANG 003 | a   | 2 | <i>Cx. quinquefascia-</i><br><i>tus</i> | 1 | m | EM 307 | Angola       | <i>Cx. pipiens</i>          | 100      | <i>Cx. quinquefasci-</i><br><i>atus</i> | 100 - 100     | 634      | LC670075 | <i>Cx. quinquefasci-</i><br><i>atus</i> | NA                                                    |
| 303 | ANG 003 | a   | 4 | <i>Cx. quinquefascia-</i><br><i>tus</i> | 1 | m | EM 308 | Angola       | <i>Cx. pipiens</i>          | 99,22    | <i>Cx. pipiens</i>                      | 99,80 - 99,21 | 512      | LC670076 | Negative                                | NA                                                    |
| 304 | ANG 002 | a   |   | <i>Cx. quinquefascia-</i><br><i>tus</i> | 1 | m | EM 309 | Angola       | <i>Cx. pipiens</i>          | 100      | <i>Cx. quinquefasci-</i><br><i>atus</i> | 100 - 100     | 632      | LC670077 | <i>Cx. quinquefasci-</i><br><i>atus</i> | NA                                                    |
| 305 | ANG 010 | a   | 5 | <i>Cx. quinquefascia-</i><br><i>tus</i> | 1 | m | EM 310 | Angola       | <i>Cx. pipiens</i>          | 100      | <i>Cx. quinquefasci-</i><br><i>atus</i> | 100 - 100     | 629      | LC670078 | <i>Cx. quinquefasci-</i><br><i>atus</i> | NA                                                    |
| 306 | ANG 029 | a   | 1 | <i>Cx. quinquefascia-</i><br><i>tus</i> | 1 | m | EM 311 | Angola       | <i>Cx. pipiens</i>          | 100      | <i>Cx. quinquefasci-</i><br><i>atus</i> | 100 - 100     | 495      | LC670079 | <i>Cx. quinquefasci-</i><br><i>atus</i> | NA                                                    |
| 307 | ANG 031 | a   |   | <i>Cx. quinquefascia-</i><br><i>tus</i> | 1 | m | EM 312 | Angola       | <i>Cx. pipiens</i>          | 100      | <i>Cx. quinquefasci-</i><br><i>atus</i> | 100 - 100     | 445      | LC670080 | Negative                                | NA                                                    |
| 308 | MZ049   | b   | 1 | <i>Cx. quinquefascia-</i><br><i>tus</i> | 1 | m | EM 313 | Mozambique   | <i>Cx. pipiens</i>          | 100      | <i>Cx. quinquefasci-</i><br><i>atus</i> | 100 - 100     | 521      | LC663998 | <i>Cx. quinquefasci-</i><br><i>atus</i> | NA                                                    |
| 309 | MZ049   | b   | 1 | <i>Cx. quinquefascia-</i><br><i>tus</i> | 1 | m | EM 314 | Mozambique   | <i>Cx. pipiens</i>          | 100      | <i>Cx. quinquefasci-</i><br><i>atus</i> | 100 - 100     | 456      | LC663999 | <i>Cx. quinquefasci-</i><br><i>atus</i> | NA                                                    |
| 310 | MZ125   | HBI | 1 | <i>Cx. quinquefascia-</i><br><i>tus</i> | 1 | m | EM 315 | Mozambique   | <i>Cx. pipiens</i>          | 100      | <i>Cx. quinquefasci-</i><br><i>atus</i> | 100 - 100     | 629      | LC664000 | <i>Cx. quinquefasci-</i><br><i>atus</i> | NA                                                    |
| 311 | MZ115   | c2  | 1 | <i>Cx. quinquefascia-</i><br><i>tus</i> | 1 | m | EM 316 | Mozambique   | <i>Cx. pipiens</i>          | 100      | <i>Cx. quinquefasci-</i><br><i>atus</i> | 100 - 100     | 439      | LC664001 | <i>Cx. quinquefasci-</i><br><i>atus</i> | NA                                                    |
| 312 | MZ118   | b2  | 1 | <i>Cx. quinquefascia-</i><br><i>tus</i> | 1 | m | EM 318 | Mozambique   | <i>Cx. pipiens</i>          | 100      | <i>Cx. quinquefasci-</i><br><i>atus</i> | 100 - 100     | 484      | LC664002 | NA                                      | NA                                                    |
| 313 | MZ122   | b2  | 1 | <i>Cx. quinquefascia-</i><br><i>tus</i> | 1 | m | EM 319 | Mozambique   | <i>Cx. pipiens</i>          | 100      | <i>Cx. quinquefasci-</i><br><i>atus</i> | 100 - 100     | 639      | LC664003 | <i>Cx. quinquefasci-</i><br><i>atus</i> | NA                                                    |
| 314 | KYA071  | g   | 4 | <i>Cx. quinquefascia-</i><br><i>tus</i> | 1 | m | EM 320 | South Africa | <i>Cx. pipiens</i>          | 99,8     | <i>Cx. pipiens</i>                      | 100 - 100     | 512      | LC670060 | Negative                                | NA                                                    |
| 315 | RPT 01  | g   | 1 | <i>Cx. quinquefascia-</i><br><i>tus</i> | 1 | m | EM 321 | South Africa | Negative                    | Negative | Negative                                | Negative      | Negative | Negative | NA                                      | NA                                                    |
| 316 | RPT 01  | g   | 2 | <i>Cx. quinquefascia-</i><br><i>tus</i> | 1 | m | EM 322 | South Africa | <i>Cx. pipiens</i>          | 100      | <i>Cx. quinquefasci-</i><br><i>atus</i> | 100 - 100     | 456      | LC670061 | NA                                      | NA                                                    |
| 317 | SA 092  | b   | 8 | <i>Cx. quinquefascia-</i><br><i>tus</i> | 1 | m | EM 323 | South Africa | <i>Cx. pipiens</i>          | 100      | <i>Cx. quinquefasci-</i><br><i>atus</i> | 100 - 100     | 496      | LC670062 | <i>Cx. quinquefasci-</i><br><i>atus</i> | NA                                                    |
| 318 | GAU117  | h   | 0 | <i>Cx. pipiens</i>                      | 1 | f | EM 326 | South Africa | <i>Cx. pipiens</i>          | 99,84    | <i>Cx. pipiens</i>                      | 99,84 - 97,79 | 635      | LC670063 | <i>Cx. pipiens</i>                      | <i>molestus</i>                                       |

|     |         |    |   |                             |   |   |        |              |                      |          |                             |               |          |          |                             |                 |
|-----|---------|----|---|-----------------------------|---|---|--------|--------------|----------------------|----------|-----------------------------|---------------|----------|----------|-----------------------------|-----------------|
| 319 | ANG 010 | a  | 2 | <i>Cx. pipiens s.l.</i>     | 1 | f | EM 327 | Angola       | <i>Cx. pipiens</i>   | 100      | <i>Cx. quinquefasciatus</i> | 100 - 100     | 480      | LC670081 | Negative                    | NA              |
| 320 | ANG 033 |    |   | <i>Cx. neavei</i>           | 1 | f | EM 328 | Angola       | <i>Cx. neavei</i>    | 98,58    | <i>Cx. neavei</i>           | 98,57 - 96,67 | 635      | LC670082 | NA                          | NA              |
| 321 | KYA082  | d  |   | <i>Cx. spp</i>              | 1 | f | EM 331 | South Africa | <i>Cx. mirificus</i> | 100      | <i>Cx. mirificus</i>        | 100 - 98,88   | 629      | LC670064 | NA                          | NA              |
| 322 | KYA083  | h  |   | <i>Cx. pipiens</i>          | 1 | f | EM 332 | South Africa | <i>Cx. pipiens</i>   | 99,69    | <i>Cx. pipiens</i>          | 99,82 - 97,79 | 635      | LC670065 | <i>Cx. pipiens</i>          | <i>molestus</i> |
| 323 | ANG 011 | a  |   | <i>Cx. quinquefasciatus</i> | 1 | f | EM 333 | Angola       | <i>Cx. pipiens</i>   | 100      | <i>Cx. quinquefasciatus</i> | 100 - 100     | 629      | LC670083 | <i>Cx. quinquefasciatus</i> | NA              |
| 324 | ANG 016 | a  |   | <i>Cx. quinquefasciatus</i> | 1 | f | EM 334 | Angola       | <i>Cx. pipiens</i>   | 100      | <i>Cx. quinquefasciatus</i> | 100 - 100     | 639      | LC670084 | <i>Cx. quinquefasciatus</i> | NA              |
| 325 | MZ010   | c1 | 1 | <i>Cx. pipiens s.l.</i>     | 1 | f | EM 335 | Mozambique   | <i>Cx. pipiens</i>   | 100      | <i>Cx. quinquefasciatus</i> | 100 - 100     | 513      | LC664004 | Negative                    | NA              |
| 326 | MZ010   | c2 | 1 | <i>Cx. pipiens s.l.</i>     | 1 | f | EM 336 | Mozambique   | Negative             | Negative | Negative                    | Negative      | Negative | Negative | NA                          | NA              |
| 327 | SA 065  | a  |   | <i>Cx. quinquefasciatus</i> | 1 | f | EM 339 | South Africa | <i>Cx. pipiens</i>   | 100      | <i>Cx. quinquefasciatus</i> | 100 - 100     | 482      | LC670066 | <i>Cx. quinquefasciatus</i> | NA              |
| 328 | SA 084  | a  | 0 | <i>Cx. quinquefasciatus</i> | 1 | f | EM 340 | South Africa | <i>Cx. pipiens</i>   | 99,84    | <i>Cx. quinquefasciatus</i> | 100 - 99,84   | 629      | LC670067 | <i>Cx. quinquefasciatus</i> | NA              |
| 329 | RPT 02  | b  | 1 | <i>Cx. quinquefasciatus</i> | 1 | f | EM 341 | South Africa | <i>Cx. pipiens</i>   | 99,56    | <i>Cx. quinquefasciatus</i> | 99,76 - 99,56 | 457      | LC670068 | <i>Cx. quinquefasciatus</i> | NA              |
| 330 | MZ013   | z  | 1 | <i>Cx. pipiens s.l.</i>     | 1 | f | EM 342 | Mozambique   | Negative             | Negative | Negative                    | Negative      | Negative | Negative | NA                          | NA              |
| 331 | MZ013   | z  | 1 | <i>Cx. pipiens s.l.</i>     | 1 | f | EM 343 | Mozambique   | Negative             | Negative | Negative                    | Negative      | Negative | Negative | Negative                    | NA              |
| 332 | GAU105  | g  |   | <i>Ae. unidentatus</i>      | 1 | f | EM 344 | South Africa | <i>Ae. mcintoshi</i> | 98,9     | <i>Ae. mcintoshi</i>        | 99,05 - 94,76 | 634      | LC670069 | NA                          | NA              |
| 333 | KYA083  | c  |   | <i>Ae. unidentatus</i>      | 1 | f | EM 345 | South Africa | <i>Ae. mcintoshi</i> | 99,21    | <i>Ae. mcintoshi</i>        | 99,37 - 94,92 | 635      | LC670070 | NA                          | NA              |
| 334 | LAP 157 | K  | 2 | <i>Ae. furcifer</i>         | 1 | m | -      | South Africa | -                    | -        | -                           | -             | -        | -        | NA                          | NA              |
| 335 | A205    | D  | 2 | <i>Ae. leesoni</i>          | 1 | m | -      | South Africa | -                    | -        | -                           | -             | -        | -        | NA                          | NA              |
| 336 | PTH 016 | a  | 3 | <i>Cq. chrysosoma</i>       | 1 | m | -      | South Africa | -                    | -        | -                           | -             | -        | -        | NA                          | NA              |
| 337 | KYA064  | g  | 5 | <i>Cx. pipiens</i>          | 1 | M | -      | South Africa | -                    | -        | -                           | -             | -        | -        | NA                          | NA              |
| 338 | SA 059  | e2 | 3 | <i>Cx. trifilatus</i>       | 1 | m | -      | South Africa | -                    | -        | -                           | -             | -        | -        | NA                          | NA              |
| 339 | MAR22 8 | g  | 3 | <i>Mi. mimomyia-formis</i>  | 1 | m | -      | South Africa | -                    | -        | -                           | -             | -        | -        | NA                          | NA              |
| 340 | PTH 003 | a  | 3 | <i>Cx. telesilla</i>        | 1 | m | -      | South Africa | -                    | -        | -                           | -             | -        | -        | NA                          | NA              |
| 341 | PTH 003 | a  | 4 | <i>Cx. telesilla</i>        | 1 | m | -      | South Africa | -                    | -        | -                           | -             | -        | -        | NA                          | NA              |
| 342 | MZ114   | d2 | 2 | <i>Ae. vittatus</i>         | 1 | m | -      | Mozambique   | -                    | -        | -                           | -             | -        | -        | NA                          | NA              |
| 343 | MZ092   | g1 | 2 | <i>Ad. africana</i>         | 1 | m | -      | Mozambique   | -                    | -        | -                           | -             | -        | -        | NA                          | NA              |

|     |           |    |    |                      |   |   |   |              |   |   |   |   |   |   |    |    |
|-----|-----------|----|----|----------------------|---|---|---|--------------|---|---|---|---|---|---|----|----|
| 344 | MZ092     | g1 | 3  | <i>Ad. africana</i>  | 1 | m | - | Mozambique   | - | - | - | - | - | - | NA | NA |
| 345 | MZ092     | g1 | 4  | <i>Ad. africana</i>  | 1 | m | - | Mozambique   | - | - | - | - | - | - | NA | NA |
| 346 | LAP 719   | B  | 1  | <i>Ae. fowleri</i>   | 1 | m | - | South Africa | - | - | - | - | - | - | NA | NA |
| 347 | LAP 719   | B  | 2  | <i>Ae. fowleri</i>   | 1 | m | - | South Africa | - | - | - | - | - | - | NA | NA |
| 348 | LAP 725   | B  |    | <i>Ae. fowleri</i>   | 1 | m | - | South Africa | - | - | - | - | - | - | NA | NA |
| 349 | CROC 001  | j  |    | <i>Ae. mcintoshi</i> | 1 | m | - | South Africa | - | - | - | - | - | - | NA | NA |
| 350 | LAP304 pa | p  | 2  | <i>Ae. mcintoshi</i> | 1 | m | - | South Africa | - | - | - | - | - | - | NA | NA |
| 351 | MAR26 0   | g  | 2  | <i>Ae. mcintoshi</i> | 1 | m | - | South Africa | - | - | - | - | - | - | NA | NA |
| 352 | MAR26 0   | g  | 3  | <i>Ae. mcintoshi</i> | 1 | m | - | South Africa | - | - | - | - | - | - | NA | NA |
| 353 | MAR26 0   | g  | 4  | <i>Ae. mcintoshi</i> | 1 | m | - | South Africa | - | - | - | - | - | - | NA | NA |
| 354 | MAR26 0   | g  | 5  | <i>Ae. mcintoshi</i> | 1 | m | - | South Africa | - | - | - | - | - | - | NA | NA |
| 355 | MAR26 0   | g  | 6  | <i>Ae. mcintoshi</i> | 1 | m | - | South Africa | - | - | - | - | - | - | NA | NA |
| 356 | MAR26 0   | g  | 7  | <i>Ae. mcintoshi</i> | 1 | m | - | South Africa | - | - | - | - | - | - | NA | NA |
| 357 | MAR26 0   | g  | 8  | <i>Ae. mcintoshi</i> | 1 | m | - | South Africa | - | - | - | - | - | - | NA | NA |
| 358 | MAR26 0   | g  | 9  | <i>Ae. mcintoshi</i> | 1 | m | - | South Africa | - | - | - | - | - | - | NA | NA |
| 359 | MAR26 0   | g  | 10 | <i>Ae. mcintoshi</i> | 1 | m | - | South Africa | - | - | - | - | - | - | NA | NA |
| 360 | MAR26 0   | g  | 11 | <i>Ae. mcintoshi</i> | 1 | m | - | South Africa | - | - | - | - | - | - | NA | NA |
| 361 | MAR26 0   | g  | 12 | <i>Ae. mcintoshi</i> | 1 | m | - | South Africa | - | - | - | - | - | - | NA | NA |
| 362 | MAR26 0   | g  | 13 | <i>Ae. mcintoshi</i> | 1 | m | - | South Africa | - | - | - | - | - | - | NA | NA |
| 363 | MAR26 0   | g  | 14 | <i>Ae. mcintoshi</i> | 1 | m | - | South Africa | - | - | - | - | - | - | NA | NA |
| 364 | MAR26 0   | g  | 16 | <i>Ae. mcintoshi</i> | 1 | m | - | South Africa | - | - | - | - | - | - | NA | NA |
| 365 | MAR26 0   | g  | 17 | <i>Ae. mcintoshi</i> | 1 | m | - | South Africa | - | - | - | - | - | - | NA | NA |

|     |            |   |    |                             |   |   |   |              |   |   |   |   |   |    |    |
|-----|------------|---|----|-----------------------------|---|---|---|--------------|---|---|---|---|---|----|----|
| 366 | MAR26<br>0 | g | 18 | <i>Ae. mcintoshi</i>        | 1 | m | - | South Africa | - | - | - | - | - | NA | NA |
| 367 | MAR26<br>0 | g | 19 | <i>Ae. mcintoshi</i>        | 1 | m | - | South Africa | - | - | - | - | - | NA | NA |
| 368 | MAR26<br>0 | g | 20 | <i>Ae. mcintoshi</i>        | 1 | m | - | South Africa | - | - | - | - | - | NA | NA |
| 369 | MAR26<br>2 | j |    | <i>Ae. mcintoshi</i>        | 1 | m | - | South Africa | - | - | - | - | - | NA | NA |
| 370 | MAR27<br>3 | i | 3  | <i>Ae. mcintoshi</i>        | 1 | m | - | South Africa | - | - | - | - | - | NA | NA |
| 371 | PTH 018    | a | 1  | <i>Ae. mcintoshi</i>        | 1 | m | - | South Africa | - | - | - | - | - | NA | NA |
| 372 | PTH 018    | a | 2  | <i>Ae. mcintoshi</i>        | 1 | m | - | South Africa | - | - | - | - | - | NA | NA |
| 373 | PTH 018    | a | 3  | <i>Ae. mcintoshi</i>        | 1 | m | - | South Africa | - | - | - | - | - | NA | NA |
| 374 | PTH 018    | a | 4  | <i>Ae. mcintoshi</i>        | 1 | m | - | South Africa | - | - | - | - | - | NA | NA |
| 375 | PTH 018    | a | 5  | <i>Ae. mcintoshi</i>        | 1 | m | - | South Africa | - | - | - | - | - | NA | NA |
| 376 | PTH 018    | a | 6  | <i>Ae. mcintoshi</i>        | 1 | m | - | South Africa | - | - | - | - | - | NA | NA |
| 377 | PTH 018    | a | 7  | <i>Ae. mcintoshi</i>        | 1 | m | - | South Africa | - | - | - | - | - | NA | NA |
| 378 | LAP 772    | s |    | <i>Ae. quasiunivittatus</i> | 1 | m | - | South Africa | - | - | - | - | - | NA | NA |
| 379 | LAP283     | l |    | <i>Ae. quasiunivittatus</i> | 1 | m | - | South Africa | - | - | - | - | - | NA | NA |
| 380 | LAP290     | k |    | <i>Ae. quasiunivittatus</i> | 1 | m | - | South Africa | - | - | - | - | - | NA | NA |
| 381 | KRU 168    | f | 3  | <i>Ae. unilineatus</i>      | 1 | m | - | South Africa | - | - | - | - | - | NA | NA |
| 382 | KRU 168    | f | 5  | <i>Ae. unilineatus</i>      | 1 | m | - | South Africa | - | - | - | - | - | NA | NA |
| 383 | KRU 170    | f | 3  | <i>Ae. unilineatus</i>      | 1 | m | - | South Africa | - | - | - | - | - | NA | NA |
| 384 | KRU 170    | f | 4  | <i>Ae. unilineatus</i>      | 1 | m | - | South Africa | - | - | - | - | - | NA | NA |
| 385 | KRU 170    | f | 5  | <i>Ae. unilineatus</i>      | 1 | m | - | South Africa | - | - | - | - | - | NA | NA |
| 386 | KZN 011    | c | 1  | <i>Ae. unilineatus</i>      | 1 | m | - | South Africa | - | - | - | - | - | NA | NA |
| 387 | KZN 011    | c | 2  | <i>Ae. unilineatus</i>      | 1 | m | - | South Africa | - | - | - | - | - | NA | NA |
| 388 | LAP 739    | h | 1  | <i>Ae. unilineatus</i>      | 1 | m | - | South Africa | - | - | - | - | - | NA | NA |
| 389 | LAP 739    | h | 2  | <i>Ae. unilineatus</i>      | 1 | m | - | South Africa | - | - | - | - | - | NA | NA |
| 390 | LAP 739    | h | 3  | <i>Ae. unilineatus</i>      | 1 | m | - | South Africa | - | - | - | - | - | NA | NA |

|     |         |       |   |                        |   |   |   |              |   |   |   |   |   |   |    |    |
|-----|---------|-------|---|------------------------|---|---|---|--------------|---|---|---|---|---|---|----|----|
| 391 | LAP 756 | b     |   | <i>Ae. unilineatus</i> | 1 | m | - | South Africa | - | - | - | - | - | - | NA | NA |
| 392 | LAP263  | p     |   | <i>Ae. unilineatus</i> | 1 | m | - | South Africa | - | - | - | - | - | - | NA | NA |
| 393 | LAP271  | r     | 2 | <i>Ae. unilineatus</i> | 1 | m | - | South Africa | - | - | - | - | - | - | NA | NA |
| 394 | LAP272  | s     |   | <i>Ae. unilineatus</i> | 1 | m | - | South Africa | - | - | - | - | - | - | NA | NA |
| 395 | LAP291  | n     |   | <i>Ae. unilineatus</i> | 1 | m | - | South Africa | - | - | - | - | - | - | NA | NA |
| 396 | MAR 670 | m     |   | <i>Ae. unilineatus</i> | 1 | m | - | South Africa | - | - | - | - | - | - | NA | NA |
| 397 | MAR253  | l     | 2 | <i>Ae. unilineatus</i> | 1 | m | - | South Africa | - | - | - | - | - | - | NA | NA |
| 398 | MAR270  | g     | 1 | <i>Ae. unilineatus</i> | 1 | m | - | South Africa | - | - | - | - | - | - | NA | NA |
| 399 | MAR270  | g     | 2 | <i>Ae. unilineatus</i> | 1 | m | - | South Africa | - | - | - | - | - | - | NA | NA |
| 400 | KRU 162 | e     | 1 | <i>Ae. vittatus</i>    | 1 | m | - | South Africa | - | - | - | - | - | - | NA | NA |
| 401 | KRU 162 | e     | 2 | <i>Ae. vittatus</i>    | 1 | m | - | South Africa | - | - | - | - | - | - | NA | NA |
| 402 | KRU 162 | e     | 2 | <i>Ae. vittatus</i>    | 1 | m | - | South Africa | - | - | - | - | - | - | NA | NA |
| 403 | KRU 162 | e     | 3 | <i>Ae. vittatus</i>    | 1 | m | - | South Africa | - | - | - | - | - | - | NA | NA |
| 404 | KRU 162 | e     | 4 | <i>Ae. vittatus</i>    | 1 | m | - | South Africa | - | - | - | - | - | - | NA | NA |
| 405 | KRU 168 | f     | 2 | <i>Ae. vittatus</i>    | 1 | m | - | South Africa | - | - | - | - | - | - | NA | NA |
| 406 | KRU 168 | f     | 4 | <i>Ae. vittatus</i>    | 1 | m | - | South Africa | - | - | - | - | - | - | NA | NA |
| 407 | KRU 168 | f     | 6 | <i>Ae. vittatus</i>    | 1 | m | - | South Africa | - | - | - | - | - | - | NA | NA |
| 408 | KRU 168 | f     | 7 | <i>Ae. vittatus</i>    | 1 | m | - | South Africa | - | - | - | - | - | - | NA | NA |
| 409 | KRU 170 | f     | 2 | <i>Ae. vittatus</i>    | 1 | m | - | South Africa | - | - | - | - | - | - | NA | NA |
| 410 | LAP 721 | h     | 1 | <i>Ae. vittatus</i>    | 1 | m | - | South Africa | - | - | - | - | - | - | NA | NA |
| 411 | LAP 721 | h     | 3 | <i>Ae. vittatus</i>    | 1 | m | - | South Africa | - | - | - | - | - | - | NA | NA |
| 412 | LAP 729 | b     |   | <i>Ae. vittatus</i>    | 1 | m | - | South Africa | - | - | - | - | - | - | NA | NA |
| 413 | LAP247  | non e |   | <i>Ae. vittatus</i>    | 1 | m | - | South Africa | - | - | - | - | - | - | NA | NA |
| 414 | LAP269  | k     | 2 | <i>Ae. vittatus</i>    | 1 | m | - | South Africa | - | - | - | - | - | - | NA | NA |
| 415 | LAP272  | t     |   | <i>Ae. vittatus</i>    | 1 | m | - | South Africa | - | - | - | - | - | - | NA | NA |
| 416 | MPK 003 |       | 1 | <i>Ae. vittatus</i>    | 1 | m | - | South Africa | - | - | - | - | - | - | NA | NA |

|     |          |     |   |                     |   |   |   |              |   |   |   |   |   |    |    |
|-----|----------|-----|---|---------------------|---|---|---|--------------|---|---|---|---|---|----|----|
| 417 | MPK 003  |     | 2 | <i>Ae. vittatus</i> | 1 | m | - | South Africa | - | - | - | - | - | NA | NA |
| 418 | MPK 003  |     | 3 | <i>Ae. vittatus</i> | 1 | m | - | South Africa | - | - | - | - | - | NA | NA |
| 419 | LAP 717  | C   |   | <i>Ae. vittatus</i> | 1 | m | - | South Africa | - | - | - | - | - | NA | NA |
| 420 | ANG 023  | c   |   | <i>Ae. aegypti</i>  | 1 | m | - | Angola       | - | - | - | - | - | NA | NA |
| 421 | ANG 024  | c   | 2 | <i>Ae. aegypti</i>  | 1 | m | - | Angola       | - | - | - | - | - | NA | NA |
| 422 | ANG 024  | c   | 3 | <i>Ae. aegypti</i>  | 1 | m | - | Angola       | - | - | - | - | - | NA | NA |
| 423 | ANG 025  | c   | 1 | <i>Ae. aegypti</i>  | 1 | m | - | Angola       | - | - | - | - | - | NA | NA |
| 424 | KRU 162  | e   | 1 | <i>Ae. aegypti</i>  | 1 | m | - | South Africa | - | - | - | - | - | NA | NA |
| 425 | KRU 170  | f   | 1 | <i>Ae. aegypti</i>  | 1 | m | - | South Africa | - | - | - | - | - | NA | NA |
| 426 | KYA067   | h   |   | <i>Ae. aegypti</i>  | 1 | m | - | South Africa | - | - | - | - | - | NA | NA |
| 427 | MZ116    | a2  | 1 | <i>Ae. aegypti</i>  | 1 | m | - | Mozambique   | - | - | - | - | - | NA | NA |
| 428 | MZ116    | a2  | 2 | <i>Ae. aegypti</i>  | 1 | m | - | Mozambique   | - | - | - | - | - | NA | NA |
| 429 | MZ116    | a2  | 3 | <i>Ae. aegypti</i>  | 1 | m | - | Mozambique   | - | - | - | - | - | NA | NA |
| 430 | MZ116    | a2  | 4 | <i>Ae. aegypti</i>  | 1 | m | - | Mozambique   | - | - | - | - | - | NA | NA |
| 431 | MZ116    | a2  | 5 | <i>Ae. aegypti</i>  | 1 | m | - | Mozambique   | - | - | - | - | - | NA | NA |
| 432 | MZ116    | a2  | 6 | <i>Ae. aegypti</i>  | 1 | m | - | Mozambique   | - | - | - | - | - | NA | NA |
| 433 | MZ116    | a2  | 7 | <i>Ae. aegypti</i>  | 1 | m | - | Mozambique   | - | - | - | - | - | NA | NA |
| 434 | MZ116    | a2  | 8 | <i>Ae. aegypti</i>  | 1 | m | - | Mozambique   | - | - | - | - | - | NA | NA |
| 435 | MZ119    | e2  | 1 | <i>Ae. aegypti</i>  | 1 | m | - | Mozambique   | - | - | - | - | - | NA | NA |
| 436 | MZ119    | e2  | 2 | <i>Ae. aegypti</i>  | 1 | m | - | Mozambique   | - | - | - | - | - | NA | NA |
| 437 | MZ119    | e2  | 3 | <i>Ae. aegypti</i>  | 1 | m | - | Mozambique   | - | - | - | - | - | NA | NA |
| 438 | PTH 019  | a   | 2 | <i>Ae. aegypti</i>  | 1 | m | - | South Africa | - | - | - | - | - | NA | NA |
| 439 | PTH 019  | a   | 3 | <i>Ae. aegypti</i>  | 1 | m | - | South Africa | - | - | - | - | - | NA | NA |
| 440 | SA 088   | c13 |   | <i>Ae. aegypti</i>  | 1 | m | - | South Africa | - | - | - | - | - | NA | NA |
| 441 | SHW 2517 |     |   | <i>Ae. aegypti</i>  | 1 | m | - | South Africa | - | - | - | - | - | NA | NA |

|     |         |    |    |                           |   |   |   |              |   |   |   |   |   |   |    |    |
|-----|---------|----|----|---------------------------|---|---|---|--------------|---|---|---|---|---|---|----|----|
| 442 | PTH 004 | a  | 2  | <i>Ae. circumluteolus</i> | 1 | m | - | South Africa | - | - | - | - | - | - | NA | NA |
| 443 | PTH 004 | a  | 3  | <i>Ae. circumluteolus</i> | 1 | m | - | South Africa | - | - | - | - | - | - | NA | NA |
| 444 | PTH 004 | a  | 5  | <i>Ae. circumluteolus</i> | 1 | m | - | South Africa | - | - | - | - | - | - | NA | NA |
| 445 | PTH 004 | a  | 6  | <i>Ae. circumluteolus</i> | 1 | m | - | South Africa | - | - | - | - | - | - | NA | NA |
| 446 | PTH 004 | a  | 7  | <i>Ae. circumluteolus</i> | 1 | m | - | South Africa | - | - | - | - | - | - | NA | NA |
| 447 | PTH 004 | a  | 8  | <i>Ae. circumluteolus</i> | 1 | m | - | South Africa | - | - | - | - | - | - | NA | NA |
| 448 | PTH 004 | a  | 10 | <i>Ae. circumluteolus</i> | 1 | m | - | South Africa | - | - | - | - | - | - | NA | NA |
| 449 | PTH 004 | a  | 11 | <i>Ae. circumluteolus</i> | 1 | m | - | South Africa | - | - | - | - | - | - | NA | NA |
| 450 | PTH 004 | a  | 12 | <i>Ae. circumluteolus</i> | 1 | m | - | South Africa | - | - | - | - | - | - | NA | NA |
| 451 | PTH 004 | a  | 13 | <i>Ae. circumluteolus</i> | 1 | m | - | South Africa | - | - | - | - | - | - | NA | NA |
| 452 | GAU 347 | g  | 3  | <i>Ae. dentatus</i>       | 1 | m | - | South Africa | - | - | - | - | - | - | NA | NA |
| 453 | KYA 396 | g  |    | <i>Ae. dentatus</i>       | 1 | m | - | South Africa | - | - | - | - | - | - | NA | NA |
| 454 | KZN 012 | g  | 1  | <i>Ae. durbanensis</i>    | 1 | m | - | South Africa | - | - | - | - | - | - | NA | NA |
| 455 | KZN 012 | g  | 2  | <i>Ae. durbanensis</i>    | 1 | m | - | South Africa | - | - | - | - | - | - | NA | NA |
| 456 | KZN 012 | g  | 5  | <i>Ae. durbanensis</i>    | 1 | m | - | South Africa | - | - | - | - | - | - | NA | NA |
| 457 | RPT 019 | i  |    | <i>Ae. hirsutus</i>       | 1 | m | - | South Africa | - | - | - | - | - | - | NA | NA |
| 458 | MZ119   | a2 | 2  | <i>Cx. annulioris</i>     | 1 | m | - | Mozambique   | - | - | - | - | - | - | NA | NA |
| 459 | MZ119   | a2 | 3  | <i>Cx. annulioris</i>     | 1 | m | - | Mozambique   | - | - | - | - | - | - | NA | NA |
| 460 | MZ119   | a2 | 4  | <i>Cx. annulioris</i>     | 1 | m | - | Mozambique   | - | - | - | - | - | - | NA | NA |
| 461 | MZ119   | a2 | 5  | <i>Cx. annulioris</i>     | 1 | m | - | Mozambique   | - | - | - | - | - | - | NA | NA |
| 462 | MZ119   | a2 | 6  | <i>Cx. annulioris</i>     | 1 | m | - | Mozambique   | - | - | - | - | - | - | NA | NA |
| 463 | MZ119   | a2 | 7  | <i>Cx. annulioris</i>     | 1 | m | - | Mozambique   | - | - | - | - | - | - | NA | NA |
| 464 | MZ119   | a2 | 9  | <i>Cx. annulioris</i>     | 1 | m | - | Mozambique   | - | - | - | - | - | - | NA | NA |
| 465 | SA 066  | b  |    | <i>Cx. annulioris</i>     | 1 | m | - | South Africa | - | - | - | - | - | - | NA | NA |
| 466 | PTH 001 | a  | 1  | <i>Cx. antennatus</i>     | 1 | m | - | South Africa | - | - | - | - | - | - | NA | NA |
| 467 | PTH 001 | a  | 2  | <i>Cx. antennatus</i>     | 1 | m | - | South Africa | - | - | - | - | - | - | NA | NA |
| 468 | PTH 001 | a  | 3  | <i>Cx. antennatus</i>     | 1 | m | - | South Africa | - | - | - | - | - | - | NA | NA |
| 469 | PTH 001 | a  | 4  | <i>Cx. antennatus</i>     | 1 | m | - | South Africa | - | - | - | - | - | - | NA | NA |

|     |         |   |    |                       |   |   |   |              |   |   |   |   |   |   |    |    |
|-----|---------|---|----|-----------------------|---|---|---|--------------|---|---|---|---|---|---|----|----|
| 470 | PTH 007 | a | 2  | <i>Cx. antennatus</i> | 1 | m | - | South Africa | - | - | - | - | - | - | NA | NA |
| 471 | PTH 009 | a | 2  | <i>Cx. antennatus</i> | 1 | m | - | South Africa | - | - | - | - | - | - | NA | NA |
| 472 | PTH 012 | a | 1  | <i>Cx. antennatus</i> | 1 | m | - | South Africa | - | - | - | - | - | - | NA | NA |
| 473 | PTH 012 | a | 2  | <i>Cx. antennatus</i> | 1 | m | - | South Africa | - | - | - | - | - | - | NA | NA |
| 474 | PTH 012 | a | 3  | <i>Cx. antennatus</i> | 1 | m | - | South Africa | - | - | - | - | - | - | NA | NA |
| 475 | PTH 012 | a | 4  | <i>Cx. antennatus</i> | 1 | m | - | South Africa | - | - | - | - | - | - | NA | NA |
| 476 | PTH 012 | a | 5  | <i>Cx. antennatus</i> | 1 | m | - | South Africa | - | - | - | - | - | - | NA | NA |
| 477 | PTH 012 | a | 6  | <i>Cx. antennatus</i> | 1 | m | - | South Africa | - | - | - | - | - | - | NA | NA |
| 478 | PTH 012 | a | 7  | <i>Cx. antennatus</i> | 1 | m | - | South Africa | - | - | - | - | - | - | NA | NA |
| 479 | PTH 012 | a | 8  | <i>Cx. antennatus</i> | 1 | m | - | South Africa | - | - | - | - | - | - | NA | NA |
| 480 | PTH 012 | a | 9  | <i>Cx. antennatus</i> | 1 | m | - | South Africa | - | - | - | - | - | - | NA | NA |
| 481 | PTH 012 | a | 10 | <i>Cx. antennatus</i> | 1 | m | - | South Africa | - | - | - | - | - | - | NA | NA |
| 482 | PTH 012 | a | 11 | <i>Cx. antennatus</i> | 1 | m | - | South Africa | - | - | - | - | - | - | NA | NA |
| 483 | PTH 012 | a | 12 | <i>Cx. antennatus</i> | 1 | m | - | South Africa | - | - | - | - | - | - | NA | NA |
| 484 | PTH 012 | a | 13 | <i>Cx. antennatus</i> | 1 | m | - | South Africa | - | - | - | - | - | - | NA | NA |
| 485 | PTH 012 | a | 14 | <i>Cx. antennatus</i> | 1 | m | - | South Africa | - | - | - | - | - | - | NA | NA |
| 486 | PTH 014 | a | 1  | <i>Cx. antennatus</i> | 1 | m | - | South Africa | - | - | - | - | - | - | NA | NA |
| 487 | PTH 014 | a | 2  | <i>Cx. antennatus</i> | 1 | m | - | South Africa | - | - | - | - | - | - | NA | NA |
| 488 | PTH 014 | a | 3  | <i>Cx. antennatus</i> | 1 | m | - | South Africa | - | - | - | - | - | - | NA | NA |
| 489 | PTH 014 | a | 4  | <i>Cx. antennatus</i> | 1 | m | - | South Africa | - | - | - | - | - | - | NA | NA |
| 490 | PTH 014 | a | 5  | <i>Cx. antennatus</i> | 1 | m | - | South Africa | - | - | - | - | - | - | NA | NA |
| 491 | PTH 014 | a | 6  | <i>Cx. antennatus</i> | 1 | m | - | South Africa | - | - | - | - | - | - | NA | NA |
| 492 | PTH 014 | a | 7  | <i>Cx. antennatus</i> | 1 | m | - | South Africa | - | - | - | - | - | - | NA | NA |
| 493 | PTH 014 | a | 8  | <i>Cx. antennatus</i> | 1 | m | - | South Africa | - | - | - | - | - | - | NA | NA |
| 494 | PTH 014 | a | 9  | <i>Cx. antennatus</i> | 1 | m | - | South Africa | - | - | - | - | - | - | NA | NA |
| 495 | PTH 017 | a | 1  | <i>Cx. antennatus</i> | 1 | m | - | South Africa | - | - | - | - | - | - | NA | NA |
| 496 | PTH 017 | a | 2  | <i>Cx. antennatus</i> | 1 | m | - | South Africa | - | - | - | - | - | - | NA | NA |
| 497 | KRU048  | u | 1  | <i>Cx. duttoni</i>    | 1 | m | - | South Africa | - | - | - | - | - | - | NA | NA |

|     |          |    |   |                         |   |   |   |              |   |   |   |   |   |    |    |
|-----|----------|----|---|-------------------------|---|---|---|--------------|---|---|---|---|---|----|----|
| 498 | MAR257   | l  | 1 | <i>Cx. ethiopicus</i>   | 1 | m | - | South Africa | - | - | - | - | - | NA | NA |
| 499 | MZ002    | l  |   | <i>Cx. ethiopicus</i>   | 1 | m | - | Mozambique   | - | - | - | - | - | NA | NA |
| 500 | LAP233   | u  |   | <i>Cx. inconspicuus</i> | 1 | m | - | South Africa | - | - | - | - | - | NA | NA |
| 501 | BEM008   | H  | 3 | <i>Cx. neavei</i>       | 1 | m | - | South Africa | - | - | - | - | - | NA | NA |
| 502 | CROC001  | i  |   | <i>Cx. neavei</i>       | 1 | m | - | South Africa | - | - | - | - | - | NA | NA |
| 503 | GAU364   | e  | 2 | <i>Cx. neavei</i>       | 1 | m | - | South Africa | - | - | - | - | - | NA | NA |
| 504 | GAU117   | w  | 9 | <i>Cx. neavei</i>       | 1 | m | - | South Africa | - | - | - | - | - | NA | NA |
| 505 | KRU048   | u  | 2 | <i>Cx. neavei</i>       | 1 | m | - | South Africa | - | - | - | - | - | NA | NA |
| 506 | LAP252   | h  |   | <i>Cx. neavei</i>       | 1 | m | - | South Africa | - | - | - | - | - | NA | NA |
| 507 | LAP271   | o  | 2 | <i>Cx. neavei</i>       | 1 | m | - | South Africa | - | - | - | - | - | NA | NA |
| 508 | LAP285   | g  |   | <i>Cx. neavei</i>       | 1 | m | - | South Africa | - | - | - | - | - | NA | NA |
| 509 | LAP300pa | h  |   | <i>Cx. neavei</i>       | 1 | m | - | South Africa | - | - | - | - | - | NA | NA |
| 510 | LAP331   | j  | 2 | <i>Cx. neavei</i>       | 1 | m | - | South Africa | - | - | - | - | - | NA | NA |
| 511 | MAK003   | S  | 1 | <i>Cx. neavei</i>       | 1 | m | - | South Africa | - | - | - | - | - | NA | NA |
| 512 | MAN709   | n  |   | <i>Cx. neavei</i>       | 1 | m | - | South Africa | - | - | - | - | - | NA | NA |
| 513 | MAR636   | e  |   | <i>Cx. neavei</i>       | 1 | m | - | South Africa | - | - | - | - | - | NA | NA |
| 514 | MAR714   | g  | 2 | <i>Cx. neavei</i>       | 1 | m | - | South Africa | - | - | - | - | - | NA | NA |
| 515 | MAR262   | i  |   | <i>Cx. neavei</i>       | 1 | m | - | South Africa | - | - | - | - | - | NA | NA |
| 516 | MAR281   | f  |   | <i>Cx. neavei</i>       | 1 | m | - | South Africa | - | - | - | - | - | NA | NA |
| 517 | MZ002    | o  | 1 | <i>Cx. neavei</i>       | 1 | m | - | Mozambique   | - | - | - | - | - | NA | NA |
| 518 | MZ002    | p  | 1 | <i>Cx. neavei</i>       | 1 | m | - | Mozambique   | - | - | - | - | - | NA | NA |
| 519 | MZ092    | f2 | 1 | <i>Cx. neavei</i>       | 1 | m | - | Mozambique   | - | - | - | - | - | NA | NA |
| 520 | PTH 002  | a  | 2 | <i>Cx. neavei</i>       | 1 | m | - | South Africa | - | - | - | - | - | NA | NA |
| 521 | PTH 002  | a  | 3 | <i>Cx. neavei</i>       | 1 | m | - | South Africa | - | - | - | - | - | NA | NA |

|     |          |    |    |                       |   |   |   |              |   |   |   |   |   |    |    |
|-----|----------|----|----|-----------------------|---|---|---|--------------|---|---|---|---|---|----|----|
| 522 | PTH 008  |    |    | <i>Cx. neavei</i>     | 1 | m | - | South Africa | - | - | - | - | - | NA | NA |
| 523 | PTH 013  | a  | 1  | <i>Cx. neavei</i>     | 1 | m | - | South Africa | - | - | - | - | - | NA | NA |
| 524 | PTH 013  | a  | 2  | <i>Cx. neavei</i>     | 1 | m | - | South Africa | - | - | - | - | - | NA | NA |
| 525 | SHW 6317 | c  |    | <i>Cx. neavei</i>     | 1 | m | - | South Africa | - | - | - | - | - | NA | NA |
| 526 | MZ114    | b2 | 2  | <i>Cx. nebulosus</i>  | 1 | m | - | Mozambique   | - | - | - | - | - | NA | NA |
| 527 | MZ114    | b2 | 3  | <i>Cx. nebulosus</i>  | 1 | m | - | Mozambique   | - | - | - | - | - | NA | NA |
| 528 | MZ114    | b2 | 6  | <i>Cx. nebulosus</i>  | 1 | m | - | Mozambique   | - | - | - | - | - | NA | NA |
| 529 | MZ114    | b2 | ?  | <i>Cx. nebulosus</i>  | 1 | m | - | Mozambique   | - | - | - | - | - | NA | NA |
| 530 | MZ115    | b4 | 1  | <i>Cx. nebulosus</i>  | 1 | m | - | Mozambique   | - | - | - | - | - | NA | NA |
| 531 | PTH 003  | a  | 10 | <i>Cx. perexiguus</i> | 1 | m | - | South Africa | - | - | - | - | - | NA | NA |
| 532 | GAU104   | f  | 3  | <i>Cx. pipiens</i>    | 1 | m | - | South Africa | - | - | - | - | - | NA | NA |
| 533 | GAU104   | f  | 5  | <i>Cx. pipiens</i>    | 1 | m | - | South Africa | - | - | - | - | - | NA | NA |
| 534 | GAU117   | z  | 1  | <i>Cx. pipiens</i>    | 1 | m | - | South Africa | - | - | - | - | - | NA | NA |
| 535 | KYA064   | g  | 0  | <i>Cx. pipiens</i>    | 1 | M | - | South Africa | - | - | - | - | - | NA | NA |
| 536 | KYA064   | g  | 1  | <i>Cx. pipiens</i>    | 1 | M | - | South Africa | - | - | - | - | - | NA | NA |
| 537 | KYA064   | g  | 3  | <i>Cx. pipiens</i>    | 1 | M | - | South Africa | - | - | - | - | - | NA | NA |
| 538 | KYA064   | g  | 4  | <i>Cx. pipiens</i>    | 1 | M | - | South Africa | - | - | - | - | - | NA | NA |
| 539 | KYA068   | d  | 3  | <i>Cx. pipiens</i>    | 1 | m | - | South Africa | - | - | - | - | - | NA | NA |
| 540 | KYA068   | d  | 5  | <i>Cx. pipiens</i>    | 1 | m | - | South Africa | - | - | - | - | - | NA | NA |
| 541 | KYA068   | d  | 7  | <i>Cx. pipiens</i>    | 1 | m | - | South Africa | - | - | - | - | - | NA | NA |
| 542 | KYA071   | g  | 2  | <i>Cx. pipiens</i>    | 1 | m | - | South Africa | - | - | - | - | - | NA | NA |
| 543 | KYA071   | g  | 3  | <i>Cx. pipiens</i>    | 1 | m | - | South Africa | - | - | - | - | - | NA | NA |
| 544 | LAP229   | s  | 2  | <i>Cx. poicilipes</i> | 1 | m | - | South Africa | - | - | - | - | - | NA | NA |
| 545 | LAP233   | v  |    | <i>Cx. poicilipes</i> | 1 | m | - | South Africa | - | - | - | - | - | NA | NA |
| 546 | MAR218   | g  | 1  | <i>Cx. poicilipes</i> | 1 | m | - | South Africa | - | - | - | - | - | NA | NA |
| 547 | MAR218   | g  | 3  | <i>Cx. poicilipes</i> | 1 | m | - | South Africa | - | - | - | - | - | NA | NA |

|     |        |    |   |                             |   |   |   |              |   |   |   |   |   |   |    |    |
|-----|--------|----|---|-----------------------------|---|---|---|--------------|---|---|---|---|---|---|----|----|
| 548 | MAR219 | c  |   | <i>Cx. poicilipes</i>       | 1 | m | - | South Africa | - | - | - | - | - | - | NA | NA |
| 549 | MAR228 | f  | 1 | <i>Cx. poicilipes</i>       | 1 | m | - | South Africa | - | - | - | - | - | - | NA | NA |
| 550 | MAR228 | f  | 2 | <i>Cx. poicilipes</i>       | 1 | m | - | South Africa | - | - | - | - | - | - | NA | NA |
| 551 | MAR229 | g  |   | <i>Cx. poicilipes</i>       | 1 | m | - | South Africa | - | - | - | - | - | - | NA | NA |
| 552 | MAR236 | c  |   | <i>Cx. poicilipes</i>       | 1 | m | - | South Africa | - | - | - | - | - | - | NA | NA |
| 553 | MAR254 | l  | 2 | <i>Cx. poicilipes</i>       | 1 | m | - | South Africa | - | - | - | - | - | - | NA | NA |
| 554 | MAR257 | l  | 2 | <i>Cx. poicilipes</i>       | 1 | m | - | South Africa | - | - | - | - | - | - | NA | NA |
| 555 | MAR263 | h  |   | <i>Cx. poicilipes</i>       | 1 | m | - | South Africa | - | - | - | - | - | - | NA | NA |
| 556 | MZ093  | h2 | 1 | <i>Cx. poicilipes</i>       | 1 | m | - | Mozambique   | - | - | - | - | - | - | NA | NA |
| 557 | MZ119  | b2 | 1 | <i>Cx. poicilipes</i>       | 1 | m | - | Mozambique   | - | - | - | - | - | - | NA | NA |
| 558 | ANG003 | a  | 1 | <i>Cx. quinquefasciatus</i> | 1 | m | - | Angola       | - | - | - | - | - | - | NA | NA |
| 559 | ANG003 | a  | 3 | <i>Cx. quinquefasciatus</i> | 1 | m | - | Angola       | - | - | - | - | - | - | NA | NA |
| 560 | ANG003 | a  | 6 | <i>Cx. quinquefasciatus</i> | 1 | m | - | Angola       | - | - | - | - | - | - | NA | NA |
| 561 | ANG003 | a  | 7 | <i>Cx. quinquefasciatus</i> | 1 | m | - | Angola       | - | - | - | - | - | - | NA | NA |
| 562 | ANG003 | a  | 8 | <i>Cx. quinquefasciatus</i> | 1 | m | - | Angola       | - | - | - | - | - | - | NA | NA |
| 563 | ANG003 | a  | 9 | <i>Cx. quinquefasciatus</i> | 1 | m | - | Angola       | - | - | - | - | - | - | NA | NA |
| 564 | ANG010 | a  | 1 | <i>Cx. quinquefasciatus</i> | 1 | m | - | Angola       | - | - | - | - | - | - | NA | NA |
| 565 | ANG010 | a  | 3 | <i>Cx. quinquefasciatus</i> | 1 | m | - | Angola       | - | - | - | - | - | - | NA | NA |
| 566 | ANG010 | a  | 4 | <i>Cx. quinquefasciatus</i> | 1 | m | - | Angola       | - | - | - | - | - | - | NA | NA |
| 567 | ANG010 | a  | 6 | <i>Cx. quinquefasciatus</i> | 1 | m | - | Angola       | - | - | - | - | - | - | NA | NA |
| 568 | ANG010 | a  | 7 | <i>Cx. quinquefasciatus</i> | 1 | m | - | Angola       | - | - | - | - | - | - | NA | NA |

|     |         |   |   |                             |   |   |   |        |   |   |   |   |   |   |    |    |
|-----|---------|---|---|-----------------------------|---|---|---|--------|---|---|---|---|---|---|----|----|
| 569 | ANG 011 | b | 1 | <i>Cx. quinquefasciatus</i> | 1 | m | - | Angola | - | - | - | - | - | - | NA | NA |
| 570 | ANG 011 | b | 2 | <i>Cx. quinquefasciatus</i> | 1 | m | - | Angola | - | - | - | - | - | - | NA | NA |
| 571 | ANG 011 | b | 3 | <i>Cx. quinquefasciatus</i> | 1 | m | - | Angola | - | - | - | - | - | - | NA | NA |
| 572 | ANG 011 | b | 4 | <i>Cx. quinquefasciatus</i> | 1 | m | - | Angola | - | - | - | - | - | - | NA | NA |
| 573 | ANG 015 | a |   | <i>Cx. quinquefasciatus</i> | 1 | m | - | Angola | - | - | - | - | - | - | NA | NA |
| 574 | ANG 017 | b | 1 | <i>Cx. quinquefasciatus</i> | 1 | m | - | Angola | - | - | - | - | - | - | NA | NA |
| 575 | ANG 017 | b | 2 | <i>Cx. quinquefasciatus</i> | 1 | m | - | Angola | - | - | - | - | - | - | NA | NA |
| 576 | ANG 017 | b | 3 | <i>Cx. quinquefasciatus</i> | 1 | m | - | Angola | - | - | - | - | - | - | NA | NA |
| 577 | ANG 019 | a | 1 | <i>Cx. quinquefasciatus</i> | 1 | m | - | Angola | - | - | - | - | - | - | NA | NA |
| 578 | ANG 019 | a | 2 | <i>Cx. quinquefasciatus</i> | 1 | m | - | Angola | - | - | - | - | - | - | NA | NA |
| 579 | ANG 019 | a | 3 | <i>Cx. quinquefasciatus</i> | 1 | m | - | Angola | - | - | - | - | - | - | NA | NA |
| 580 | ANG 019 | a | 4 | <i>Cx. quinquefasciatus</i> | 1 | m | - | Angola | - | - | - | - | - | - | NA | NA |
| 581 | ANG 021 | a | 1 | <i>Cx. quinquefasciatus</i> | 1 | m | - | Angola | - | - | - | - | - | - | NA | NA |
| 582 | ANG 021 | a | 2 | <i>Cx. quinquefasciatus</i> | 1 | m | - | Angola | - | - | - | - | - | - | NA | NA |
| 583 | ANG 021 | a | 3 | <i>Cx. quinquefasciatus</i> | 1 | m | - | Angola | - | - | - | - | - | - | NA | NA |
| 584 | ANG 021 | a | 4 | <i>Cx. quinquefasciatus</i> | 1 | m | - | Angola | - | - | - | - | - | - | NA | NA |
| 585 | ANG 021 | a | 5 | <i>Cx. quinquefasciatus</i> | 1 | m | - | Angola | - | - | - | - | - | - | NA | NA |
| 586 | ANG 022 | a | 1 | <i>Cx. quinquefasciatus</i> | 1 | m | - | Angola | - | - | - | - | - | - | NA | NA |
| 587 | ANG 022 | a | 2 | <i>Cx. quinquefasciatus</i> | 1 | m | - | Angola | - | - | - | - | - | - | NA | NA |
| 588 | ANG 022 | a | 3 | <i>Cx. quinquefasciatus</i> | 1 | m | - | Angola | - | - | - | - | - | - | NA | NA |
| 589 | ANG 023 | a | 1 | <i>Cx. quinquefasciatus</i> | 1 | m | - | Angola | - | - | - | - | - | - | NA | NA |

|     |         |     |   |                             |   |   |   |              |   |   |   |   |   |   |    |    |
|-----|---------|-----|---|-----------------------------|---|---|---|--------------|---|---|---|---|---|---|----|----|
| 590 | ANG 023 | a   | 2 | <i>Cx. quinquefasciatus</i> | 1 | m | - | Angola       | - | - | - | - | - | - | NA | NA |
| 591 | ANG 023 | a   | 3 | <i>Cx. quinquefasciatus</i> | 1 | m | - | Angola       | - | - | - | - | - | - | NA | NA |
| 592 | ANG 023 | a   | 4 | <i>Cx. quinquefasciatus</i> | 1 | m | - | Angola       | - | - | - | - | - | - | NA | NA |
| 593 | ANG 024 | a   |   | <i>Cx. quinquefasciatus</i> | 1 | m | - | Angola       | - | - | - | - | - | - | NA | NA |
| 594 | ANG 025 | a   | 1 | <i>Cx. quinquefasciatus</i> | 1 | m | - | Angola       | - | - | - | - | - | - | NA | NA |
| 595 | ANG 025 | a   | 2 | <i>Cx. quinquefasciatus</i> | 1 | m | - | Angola       | - | - | - | - | - | - | NA | NA |
| 596 | ANG 028 | a   | 1 | <i>Cx. quinquefasciatus</i> | 1 | m | - | Angola       | - | - | - | - | - | - | NA | NA |
| 597 | ANG 028 | a   | 2 | <i>Cx. quinquefasciatus</i> | 1 | m | - | Angola       | - | - | - | - | - | - | NA | NA |
| 598 | ANG 029 | a   | 2 | <i>Cx. quinquefasciatus</i> | 1 | m | - | Angola       | - | - | - | - | - | - | NA | NA |
| 599 | ANG 035 | a   |   | <i>Cx. quinquefasciatus</i> | 1 | m | - | Angola       | - | - | - | - | - | - | NA | NA |
| 600 | LAP     | a   | 2 | <i>Cx. quinquefasciatus</i> | 1 | m | - | South Africa | - | - | - | - | - | - | NA | NA |
| 601 | MZ049   | b   | 1 | <i>Cx. quinquefasciatus</i> | 1 | m | - | Mozambique   | - | - | - | - | - | - | NA | NA |
| 602 | MZ049   | b   | 1 | <i>Cx. quinquefasciatus</i> | 1 | m | - | Mozambique   | - | - | - | - | - | - | NA | NA |
| 603 | MZ049   | b   | 1 | <i>Cx. quinquefasciatus</i> | 1 | m | - | Mozambique   | - | - | - | - | - | - | NA | NA |
| 604 | MZ049   | b   | 1 | <i>Cx. quinquefasciatus</i> | 1 | m | - | Mozambique   | - | - | - | - | - | - | NA | NA |
| 605 | MZ049   | b   | 1 | <i>Cx. quinquefasciatus</i> | 1 | m | - | Mozambique   | - | - | - | - | - | - | NA | NA |
| 606 | MZ049   | b   | 1 | <i>Cx. quinquefasciatus</i> | 1 | m | - | Mozambique   | - | - | - | - | - | - | NA | NA |
| 607 | MZ049   | b   | 1 | <i>Cx. quinquefasciatus</i> | 1 | m | - | Mozambique   | - | - | - | - | - | - | NA | NA |
| 608 | MZ054   | a+b | 1 | <i>Cx. quinquefasciatus</i> | 1 | m | - | Mozambique   | - | - | - | - | - | - | NA | NA |
| 609 | MZ115   | c2  | 1 | <i>Cx. quinquefasciatus</i> | 1 | m | - | Mozambique   | - | - | - | - | - | - | NA | NA |
| 610 | MZ115   | c2  | 1 | <i>Cx. quinquefasciatus</i> | 1 | m | - | Mozambique   | - | - | - | - | - | - | NA | NA |

|     |       |    |   |                             |   |   |   |            |   |   |   |   |   |   |    |    |
|-----|-------|----|---|-----------------------------|---|---|---|------------|---|---|---|---|---|---|----|----|
| 611 | MZ115 | c2 | 1 | <i>Cx. quinquefasciatus</i> | 1 | m | - | Mozambique | - | - | - | - | - | - | NA | NA |
| 612 | MZ115 | c2 | 1 | <i>Cx. quinquefasciatus</i> | 1 | m | - | Mozambique | - | - | - | - | - | - | NA | NA |
| 613 | MZ115 | c2 | 1 | <i>Cx. quinquefasciatus</i> | 1 | m | - | Mozambique | - | - | - | - | - | - | NA | NA |
| 614 | MZ115 | c2 | 1 | <i>Cx. quinquefasciatus</i> | 1 | m | - | Mozambique | - | - | - | - | - | - | NA | NA |
| 615 | MZ115 | c2 | 1 | <i>Cx. quinquefasciatus</i> | 1 | m | - | Mozambique | - | - | - | - | - | - | NA | NA |
| 616 | MZ115 | c2 | 1 | <i>Cx. quinquefasciatus</i> | 1 | m | - | Mozambique | - | - | - | - | - | - | NA | NA |
| 617 | MZ115 | c2 | 1 | <i>Cx. quinquefasciatus</i> | 1 | m | - | Mozambique | - | - | - | - | - | - | NA | NA |
| 618 | MZ115 | c2 | 1 | <i>Cx. quinquefasciatus</i> | 1 | m | - | Mozambique | - | - | - | - | - | - | NA | NA |
| 619 | MZ115 | c2 | 1 | <i>Cx. quinquefasciatus</i> | 1 | m | - | Mozambique | - | - | - | - | - | - | NA | NA |
| 620 | MZ115 | c2 | 1 | <i>Cx. quinquefasciatus</i> | 1 | m | - | Mozambique | - | - | - | - | - | - | NA | NA |
| 621 | MZ115 | c2 | 1 | <i>Cx. quinquefasciatus</i> | 1 | m | - | Mozambique | - | - | - | - | - | - | NA | NA |
| 622 | MZ115 | c2 | 1 | <i>Cx. quinquefasciatus</i> | 1 | m | - | Mozambique | - | - | - | - | - | - | NA | NA |
| 623 | MZ115 | c2 | 1 | <i>Cx. quinquefasciatus</i> | 1 | m | - | Mozambique | - | - | - | - | - | - | NA | NA |
| 624 | MZ115 | c2 | 1 | <i>Cx. quinquefasciatus</i> | 1 | m | - | Mozambique | - | - | - | - | - | - | NA | NA |
| 625 | MZ115 | c2 | 1 | <i>Cx. quinquefasciatus</i> | 1 | m | - | Mozambique | - | - | - | - | - | - | NA | NA |
| 626 | MZ115 | c2 | 1 | <i>Cx. quinquefasciatus</i> | 1 | m | - | Mozambique | - | - | - | - | - | - | NA | NA |
| 627 | MZ115 | c2 | 1 | <i>Cx. quinquefasciatus</i> | 1 | m | - | Mozambique | - | - | - | - | - | - | NA | NA |
| 628 | MZ115 | c2 | 1 | <i>Cx. quinquefasciatus</i> | 1 | m | - | Mozambique | - | - | - | - | - | - | NA | NA |
| 629 | MZ115 | c2 | 1 | <i>Cx. quinquefasciatus</i> | 1 | m | - | Mozambique | - | - | - | - | - | - | NA | NA |
| 630 | MZ115 | c2 | 1 | <i>Cx. quinquefasciatus</i> | 1 | m | - | Mozambique | - | - | - | - | - | - | NA | NA |
| 631 | MZ115 | c2 | 1 | <i>Cx. quinquefasciatus</i> | 1 | m | - | Mozambique | - | - | - | - | - | - | NA | NA |

|     |        |    |   |                             |   |   |   |              |   |   |   |   |   |   |    |    |
|-----|--------|----|---|-----------------------------|---|---|---|--------------|---|---|---|---|---|---|----|----|
| 632 | MZ115  | c2 | 1 | <i>Cx. quinquefasciatus</i> | 1 | m | - | Mozambique   | - | - | - | - | - | - | NA | NA |
| 633 | MZ115  | c2 | 1 | <i>Cx. quinquefasciatus</i> | 1 | m | - | Mozambique   | - | - | - | - | - | - | NA | NA |
| 634 | MZ115  | c2 | 1 | <i>Cx. quinquefasciatus</i> | 1 | m | - | Mozambique   | - | - | - | - | - | - | NA | NA |
| 635 | MZ115  | c2 | 1 | <i>Cx. quinquefasciatus</i> | 1 | m | - | Mozambique   | - | - | - | - | - | - | NA | NA |
| 636 | MZ115  | c2 | 1 | <i>Cx. quinquefasciatus</i> | 1 | m | - | Mozambique   | - | - | - | - | - | - | NA | NA |
| 637 | MZ115  | c2 | 1 | <i>Cx. quinquefasciatus</i> | 1 | m | - | Mozambique   | - | - | - | - | - | - | NA | NA |
| 638 | MZ115  | c2 | 1 | <i>Cx. quinquefasciatus</i> | 1 | m | - | Mozambique   | - | - | - | - | - | - | NA | NA |
| 639 | MZ115  | c2 | 1 | <i>Cx. quinquefasciatus</i> | 1 | m | - | Mozambique   | - | - | - | - | - | - | NA | NA |
| 640 | MZ115  | c2 | 1 | <i>Cx. quinquefasciatus</i> | 1 | m | - | Mozambique   | - | - | - | - | - | - | NA | NA |
| 641 | MZ115  | c2 | 1 | <i>Cx. quinquefasciatus</i> | 1 | m | - | Mozambique   | - | - | - | - | - | - | NA | NA |
| 642 | MZ115  | c2 | 1 | <i>Cx. quinquefasciatus</i> | 1 | m | - | Mozambique   | - | - | - | - | - | - | NA | NA |
| 643 | MZ115  | c2 | 1 | <i>Cx. quinquefasciatus</i> | 1 | m | - | Mozambique   | - | - | - | - | - | - | NA | NA |
| 644 | MZ118  | b2 | 1 | <i>Cx. quinquefasciatus</i> | 1 | m | - | Mozambique   | - | - | - | - | - | - | NA | NA |
| 645 | MZ122  | b2 | 1 | <i>Cx. quinquefasciatus</i> | 1 | m | - | Mozambique   | - | - | - | - | - | - | NA | NA |
| 646 | PRE    | a  | 2 | <i>Cx. quinquefasciatus</i> | 1 | m | - | South Africa | - | - | - | - | - | - | NA | NA |
| 647 | SA 055 | b  | 1 | <i>Cx. quinquefasciatus</i> | 1 | m | - | South Africa | - | - | - | - | - | - | NA | NA |
| 648 | SA 055 | b  | 2 | <i>Cx. quinquefasciatus</i> | 1 | m | - | South Africa | - | - | - | - | - | - | NA | NA |
| 649 | SA 064 | b  |   | <i>Cx. quinquefasciatus</i> | 1 | m | - | South Africa | - | - | - | - | - | - | NA | NA |
| 650 | SA 065 | b  | 1 | <i>Cx. quinquefasciatus</i> | 1 | m | - | South Africa | - | - | - | - | - | - | NA | NA |
| 651 | SA 065 | b  |   | <i>Cx. quinquefasciatus</i> | 1 | m | - | South Africa | - | - | - | - | - | - | NA | NA |
| 652 | SA 083 | b  |   | <i>Cx. quinquefasciatus</i> | 1 | m | - | South Africa | - | - | - | - | - | - | NA | NA |

|     |        |   |    |                             |   |   |   |              |   |   |   |   |   |   |    |    |
|-----|--------|---|----|-----------------------------|---|---|---|--------------|---|---|---|---|---|---|----|----|
| 653 | SA 084 | b |    | <i>Cx. quinquefasciatus</i> | 1 | m | - | South Africa | - | - | - | - | - | - | NA | NA |
| 654 | SA 087 | b |    | <i>Cx. quinquefasciatus</i> | 1 | m | - | South Africa | - | - | - | - | - | - | NA | NA |
| 655 | SA 091 | b |    | <i>Cx. quinquefasciatus</i> | 1 | m | - | South Africa | - | - | - | - | - | - | NA | NA |
| 656 | SA 092 | b | 1  | <i>Cx. quinquefasciatus</i> | 1 | m | - | South Africa | - | - | - | - | - | - | NA | NA |
| 657 | SA 092 | b | 9  | <i>Cx. quinquefasciatus</i> | 1 | m | - | South Africa | - | - | - | - | - | - | NA | NA |
| 658 | SA 093 | b | 1  | <i>Cx. quinquefasciatus</i> | 1 | m | - | South Africa | - | - | - | - | - | - | NA | NA |
| 659 | SA 093 | b | 2  | <i>Cx. quinquefasciatus</i> | 1 | m | - | South Africa | - | - | - | - | - | - | NA | NA |
| 660 | SA 093 | b | 20 | <i>Cx. quinquefasciatus</i> | 1 | m | - | South Africa | - | - | - | - | - | - | NA | NA |
| 661 | SA 093 | b | 22 | <i>Cx. quinquefasciatus</i> | 1 | m | - | South Africa | - | - | - | - | - | - | NA | NA |
| 662 | SA 093 | b | 23 | <i>Cx. quinquefasciatus</i> | 1 | m | - | South Africa | - | - | - | - | - | - | NA | NA |
| 663 | GAU086 | b | 2  | <i>Cx. theileri</i>         | 1 | m | - | South Africa | - | - | - | - | - | - | NA | NA |
| 664 | GAU086 | b | 3  | <i>Cx. theileri</i>         | 1 | m | - | South Africa | - | - | - | - | - | - | NA | NA |
| 665 | GAU087 | d | 1  | <i>Cx. theileri</i>         | 1 | m | - | South Africa | - | - | - | - | - | - | NA | NA |
| 666 | GAU087 | d | 2  | <i>Cx. theileri</i>         | 1 | m | - | South Africa | - | - | - | - | - | - | NA | NA |
| 667 | GAU088 | f | 2  | <i>Cx. theileri</i>         | 1 | m | - | South Africa | - | - | - | - | - | - | NA | NA |
| 668 | GAU104 | g | 1  | <i>Cx. theileri</i>         | 1 | m | - | South Africa | - | - | - | - | - | - | NA | NA |
| 669 | GAU104 | g | 2  | <i>Cx. theileri</i>         | 1 | m | - | South Africa | - | - | - | - | - | - | NA | NA |
| 670 | GAU104 | g | 3  | <i>Cx. theileri</i>         | 1 | m | - | South Africa | - | - | - | - | - | - | NA | NA |
| 671 | GAU104 | g | 4  | <i>Cx. theileri</i>         | 1 | m | - | South Africa | - | - | - | - | - | - | NA | NA |
| 672 | GAU104 | g | 5  | <i>Cx. theileri</i>         | 1 | m | - | South Africa | - | - | - | - | - | - | NA | NA |
| 673 | GAU117 | x | 2  | <i>Cx. theileri</i>         | 1 | m | - | South Africa | - | - | - | - | - | - | NA | NA |
| 674 | KYA064 | f | 1  | <i>Cx. theileri</i>         | 1 | M | - | South Africa | - | - | - | - | - | - | NA | NA |
| 675 | KYA064 | f | 2  | <i>Cx. theileri</i>         | 1 | M | - | South Africa | - | - | - | - | - | - | NA | NA |
| 676 | KYA068 | d | 2  | <i>Cx. theileri</i>         | 1 | m | - | South Africa | - | - | - | - | - | - | NA | NA |

|     |         |    |   |                        |   |   |   |              |   |   |   |   |   |   |    |    |
|-----|---------|----|---|------------------------|---|---|---|--------------|---|---|---|---|---|---|----|----|
| 677 | KYA068  | d  | 6 | <i>Cx. theileri</i>    | 1 | m | - | South Africa | - | - | - | - | - | - | NA | NA |
| 678 | KYA071  | e  | 2 | <i>Cx. theileri</i>    | 1 | m | - | South Africa | - | - | - | - | - | - | NA | NA |
| 679 | SA 059  | e1 | 3 | <i>Cx. trifilatus</i>  | 1 | m | - | South Africa | - | - | - | - | - | - | NA | NA |
| 680 | SA 059  | e1 | 5 | <i>Cx. trifilatus</i>  | 1 | m | - | South Africa | - | - | - | - | - | - | NA | NA |
| 681 | SA 059  | e2 | 2 | <i>Cx. trifilatus</i>  | 1 | m | - | South Africa | - | - | - | - | - | - | NA | NA |
| 682 | ANG 032 |    |   | <i>Cx. univittatus</i> | 1 | m | - | Angola       | - | - | - | - | - | - | NA | NA |
| 683 | BEM 008 | H  | 1 | <i>Cx. univittatus</i> | 1 | m | - | South Africa | - | - | - | - | - | - | NA | NA |
| 684 | BEM 008 | H  | 2 | <i>Cx. univittatus</i> | 1 | m | - | South Africa | - | - | - | - | - | - | NA | NA |
| 685 | GAU 347 | i  | 1 | <i>Cx. univittatus</i> | 1 | m | - | South Africa | - | - | - | - | - | - | NA | NA |
| 686 | GAU 347 | i  | 2 | <i>Cx. univittatus</i> | 1 | m | - | South Africa | - | - | - | - | - | - | NA | NA |
| 687 | GAU 347 | i  | 4 | <i>Cx. univittatus</i> | 1 | m | - | South Africa | - | - | - | - | - | - | NA | NA |
| 688 | GAU 347 | i  | 5 | <i>Cx. univittatus</i> | 1 | m | - | South Africa | - | - | - | - | - | - | NA | NA |
| 689 | GAU 364 | e  | 1 | <i>Cx. univittatus</i> | 1 | m | - | South Africa | - | - | - | - | - | - | NA | NA |
| 690 | GAU086  | g  |   | <i>Cx. univittatus</i> | 1 | m | - | South Africa | - | - | - | - | - | - | NA | NA |
| 691 | GAU091  | f  | 1 | <i>Cx. univittatus</i> | 1 | m | - | South Africa | - | - | - | - | - | - | NA | NA |
| 692 | GAU091  | f  | 2 | <i>Cx. univittatus</i> | 1 | m | - | South Africa | - | - | - | - | - | - | NA | NA |
| 693 | GAU091  | f  | 3 | <i>Cx. univittatus</i> | 1 | m | - | South Africa | - | - | - | - | - | - | NA | NA |
| 694 | GAU091  | f  | 4 | <i>Cx. univittatus</i> | 1 | m | - | South Africa | - | - | - | - | - | - | NA | NA |
| 695 | GAU091  | f  | 5 | <i>Cx. univittatus</i> | 1 | m | - | South Africa | - | - | - | - | - | - | NA | NA |
| 696 | GAU104  | f  | 1 | <i>Cx. univittatus</i> | 1 | m | - | South Africa | - | - | - | - | - | - | NA | NA |
| 697 | GAU104  | f  | 4 | <i>Cx. univittatus</i> | 1 | m | - | South Africa | - | - | - | - | - | - | NA | NA |
| 698 | GAU117  | w  | 4 | <i>Cx. univittatus</i> | 1 | m | - | South Africa | - | - | - | - | - | - | NA | NA |
| 699 | GAU117  | w  | 5 | <i>Cx. univittatus</i> | 1 | m | - | South Africa | - | - | - | - | - | - | NA | NA |
| 700 | GAU117  | w  | 6 | <i>Cx. univittatus</i> | 1 | m | - | South Africa | - | - | - | - | - | - | NA | NA |
| 701 | GAU117  | w  | 7 | <i>Cx. univittatus</i> | 1 | m | - | South Africa | - | - | - | - | - | - | NA | NA |

|     |         |    |    |                        |   |   |   |              |   |   |   |   |   |   |    |    |
|-----|---------|----|----|------------------------|---|---|---|--------------|---|---|---|---|---|---|----|----|
| 702 | GAU117  | w  | 8  | <i>Cx. univittatus</i> | 1 | m | - | South Africa | - | - | - | - | - | - | NA | NA |
| 703 | KYA064  | e  | 1  | <i>Cx. univittatus</i> | 1 | M | - | South Africa | - | - | - | - | - | - | NA | NA |
| 704 | KYA064  | e  | 3  | <i>Cx. univittatus</i> | 1 | M | - | South Africa | - | - | - | - | - | - | NA | NA |
| 705 | KYA064  | e  | 4  | <i>Cx. univittatus</i> | 1 | M | - | South Africa | - | - | - | - | - | - | NA | NA |
| 706 | KYA070  | g  | 2  | <i>Cx. univittatus</i> | 1 | m | - | South Africa | - | - | - | - | - | - | NA | NA |
| 707 | KYA070  | g  | 3  | <i>Cx. univittatus</i> | 1 | m | - | South Africa | - | - | - | - | - | - | NA | NA |
| 708 | KYA070  | g  | 4  | <i>Cx. univittatus</i> | 1 | m | - | South Africa | - | - | - | - | - | - | NA | NA |
| 709 | KYA076  | e1 |    | <i>Cx. univittatus</i> | 1 | m | - | South Africa | - | - | - | - | - | - | NA | NA |
| 710 | KYA076  | e2 |    | <i>Cx. univittatus</i> | 1 | m | - | South Africa | - | - | - | - | - | - | NA | NA |
| 711 | KYA082  | f  | 1  | <i>Cx. univittatus</i> | 1 | m | - | South Africa | - | - | - | - | - | - | NA | NA |
| 712 | KYA082  | f  | 3  | <i>Cx. univittatus</i> | 1 | m | - | South Africa | - | - | - | - | - | - | NA | NA |
| 713 | KYA082  | f  | 4  | <i>Cx. univittatus</i> | 1 | m | - | South Africa | - | - | - | - | - | - | NA | NA |
| 714 | KYA082  | f  | 5  | <i>Cx. univittatus</i> | 1 | m | - | South Africa | - | - | - | - | - | - | NA | NA |
| 715 | KYA082  | f  | 6  | <i>Cx. univittatus</i> | 1 | m | - | South Africa | - | - | - | - | - | - | NA | NA |
| 716 | KYA082  | f  | 7  | <i>Cx. univittatus</i> | 1 | m | - | South Africa | - | - | - | - | - | - | NA | NA |
| 717 | KYA083  | j  |    | <i>Cx. univittatus</i> | 1 | m | - | South Africa | - | - | - | - | - | - | NA | NA |
| 718 | KYA088  | g  | 1  | <i>Cx. univittatus</i> | 1 | m | - | South Africa | - | - | - | - | - | - | NA | NA |
| 719 | KYA088  | g  | 2  | <i>Cx. univittatus</i> | 1 | m | - | South Africa | - | - | - | - | - | - | NA | NA |
| 720 | KYA114  | d  | 1  | <i>Cx. univittatus</i> | 1 | m | - | South Africa | - | - | - | - | - | - | NA | NA |
| 721 | KYA114  | d  | 2  | <i>Cx. univittatus</i> | 1 | m | - | South Africa | - | - | - | - | - | - | NA | NA |
| 722 | LAP     | a  | 3  | <i>Cx. univittatus</i> | 1 | m | - | South Africa | - | - | - | - | - | - | NA | NA |
| 723 | LAP232  | s  | 1  | <i>Cx. univittatus</i> | 1 | m | - | South Africa | - | - | - | - | - | - | NA | NA |
| 724 | LAP264  | t  | 2  | <i>Cx. univittatus</i> | 1 | m | - | South Africa | - | - | - | - | - | - | NA | NA |
| 725 | LAP265  | o  |    | <i>Cx. univittatus</i> | 1 | m | - | South Africa | - | - | - | - | - | - | NA | NA |
| 726 | LAP283  | m  |    | <i>Cx. univittatus</i> | 1 | m | - | South Africa | - | - | - | - | - | - | NA | NA |
| 727 | MAR 714 | g  | 3  | <i>Cx. univittatus</i> | 1 | m | - | South Africa | - | - | - | - | - | - | NA | NA |
| 728 | PTH 013 | a  | 3  | <i>Cx. univittatus</i> | 1 | m | - | South Africa | - | - | - | - | - | - | NA | NA |
| 729 | MZ005   | j  | 27 | <i>Cx. simpsoni</i>    | 1 | m | - | Mozambique   | - | - | - | - | - | - | NA | NA |

|     |         |    |    |                           |   |   |   |              |   |   |   |   |   |   |    |    |
|-----|---------|----|----|---------------------------|---|---|---|--------------|---|---|---|---|---|---|----|----|
| 730 | MZ006   | j  | 1  | <i>Cx. simpsoni</i>       | 1 | m | - | Mozambique   | - | - | - | - | - | - | NA | NA |
| 731 | MZ006   | j  | 2  | <i>Cx. simpsoni</i>       | 1 | m | - | Mozambique   | - | - | - | - | - | - | NA | NA |
| 732 | MZ122   | b2 | 3  | <i>Cx. simpsoni</i>       | 1 | m | - | Mozambique   | - | - | - | - | - | - | NA | NA |
| 733 | MZ123   | c1 | 1  | <i>Cx. simpsoni</i>       | 1 | m | - | Mozambique   | - | - | - | - | - | - | NA | NA |
| 734 | MZ114   | c2 | 2  | <i>Er. subsimplicipes</i> | 1 | m | - | Mozambique   | - | - | - | - | - | - | NA | NA |
| 735 | ANG 035 | c  | 1  | <i>Lt. tigripes</i>       | 1 | m | - | Angola       | - | - | - | - | - | - | NA | NA |
| 736 | ANG 035 | c  | 2  | <i>Lt. tigripes</i>       | 1 | m | - | Angola       | - | - | - | - | - | - | NA | NA |
| 737 | ANG 035 | c  | 3  | <i>Lt. tigripes</i>       | 1 | m | - | Angola       | - | - | - | - | - | - | NA | NA |
| 738 | ANG 035 | c  | 4  | <i>Lt. tigripes</i>       | 1 | m | - | Angola       | - | - | - | - | - | - | NA | NA |
| 739 | ANG 035 | c  | 5  | <i>Lt. tigripes</i>       | 1 | m | - | Angola       | - | - | - | - | - | - | NA | NA |
| 740 | ANG 035 | c  | 6  | <i>Lt. tigripes</i>       | 1 | m | - | Angola       | - | - | - | - | - | - | NA | NA |
| 741 | ANG 035 | c  | 7  | <i>Lt. tigripes</i>       | 1 | m | - | Angola       | - | - | - | - | - | - | NA | NA |
| 742 | ANG 035 | c  | 8  | <i>Lt. tigripes</i>       | 1 | m | - | Angola       | - | - | - | - | - | - | NA | NA |
| 743 | ANG 035 | c  | 9  | <i>Lt. tigripes</i>       | 1 | m | - | Angola       | - | - | - | - | - | - | NA | NA |
| 744 | KYA068  | d  | 1  | <i>Lt. tigripes</i>       | 1 | m | - | South Africa | - | - | - | - | - | - | NA | NA |
| 745 | PRE     | a  | 3  | <i>Lt. tigripes</i>       | 1 | m | - | South Africa | - | - | - | - | - | - | NA | NA |
| 746 | MPA 001 | B  |    | <i>Ma. africana</i>       | 1 | m | - | South Africa | - | - | - | - | - | - | NA | NA |
| 747 | MZ011   | a  | 1  | <i>Ma. africana</i>       | 1 | f | - | Mozambique   | - | - | - | - | - | - | NA | NA |
| 748 | MZ011   | a  | 2  | <i>Ma. africana</i>       | 1 | f | - | Mozambique   | - | - | - | - | - | - | NA | NA |
| 749 | MZ011   | m  | 1  | <i>Ma. africana</i>       | 1 | m | - | Mozambique   | - | - | - | - | - | - | NA | NA |
| 750 | MZ011   | m  | 3  | <i>Ma. africana</i>       | 1 | m | - | Mozambique   | - | - | - | - | - | - | NA | NA |
| 751 | MZ011   | m  | 8  | <i>Ma. africana</i>       | 1 | m | - | Mozambique   | - | - | - | - | - | - | NA | NA |
| 752 | MZ012   | j  | 14 | <i>Ma. africana</i>       | 1 | m | - | Mozambique   | - | - | - | - | - | - | NA | NA |
| 753 | MZ012   | j  | 15 | <i>Ma. africana</i>       | 1 | m | - | Mozambique   | - | - | - | - | - | - | NA | NA |

|     |       |    |    |                      |   |   |   |            |   |   |   |   |   |   |    |    |
|-----|-------|----|----|----------------------|---|---|---|------------|---|---|---|---|---|---|----|----|
| 754 | MZ012 | j  | 16 | <i>Ma. africana</i>  | 1 | m | - | Mozambique | - | - | - | - | - | - | NA | NA |
| 755 | MZ012 | j  | 17 | <i>Ma. africana</i>  | 1 | m | - | Mozambique | - | - | - | - | - | - | NA | NA |
| 756 | MZ012 | j  | 18 | <i>Ma. africana</i>  | 1 | m | - | Mozambique | - | - | - | - | - | - | NA | NA |
| 757 | MZ013 | aa | 1  | <i>Ma. africana</i>  | 1 | f | - | Mozambique | - | - | - | - | - | - | NA | NA |
| 758 | MZ013 | aa | 2  | <i>Ma. africana</i>  | 1 | f | - | Mozambique | - | - | - | - | - | - | NA | NA |
| 759 | MZ013 | aa | 3  | <i>Ma. africana</i>  | 1 | f | - | Mozambique | - | - | - | - | - | - | NA | NA |
| 760 | MZ013 | aa | 4  | <i>Ma. africana</i>  | 1 | f | - | Mozambique | - | - | - | - | - | - | NA | NA |
| 761 | MZ013 | aa | 5  | <i>Ma. africana</i>  | 1 | f | - | Mozambique | - | - | - | - | - | - | NA | NA |
| 762 | MZ013 | ab | 2  | <i>Ma. africana</i>  | 1 | m | - | Mozambique | - | - | - | - | - | - | NA | NA |
| 763 | MZ013 | ab | 4  | <i>Ma. africana</i>  | 1 | m | - | Mozambique | - | - | - | - | - | - | NA | NA |
| 764 | MZ014 | m  | 1  | <i>Ma. africana</i>  | 1 | m | - | Mozambique | - | - | - | - | - | - | NA | NA |
| 765 | MZ014 | m  | 2  | <i>Ma. africana</i>  | 1 | m | - | Mozambique | - | - | - | - | - | - | NA | NA |
| 766 | MZ014 | m  | 3  | <i>Ma. africana</i>  | 1 | m | - | Mozambique | - | - | - | - | - | - | NA | NA |
| 767 | MZ014 | m  | 4  | <i>Ma. africana</i>  | 1 | m | - | Mozambique | - | - | - | - | - | - | NA | NA |
| 768 | MZ014 | m  | 5  | <i>Ma. africana</i>  | 1 | m | - | Mozambique | - | - | - | - | - | - | NA | NA |
| 769 | MZ014 | m  | 6  | <i>Ma. africana</i>  | 1 | m | - | Mozambique | - | - | - | - | - | - | NA | NA |
| 770 | MZ014 | m  | 7  | <i>Ma. africana</i>  | 1 | m | - | Mozambique | - | - | - | - | - | - | NA | NA |
| 771 | MZ014 | m  | 9  | <i>Ma. africana</i>  | 1 | m | - | Mozambique | - | - | - | - | - | - | NA | NA |
| 772 | MZ015 | w  | 1  | <i>Ma. africana</i>  | 1 | m | - | Mozambique | - | - | - | - | - | - | NA | NA |
| 773 | MZ015 | w  | 2  | <i>Ma. africana</i>  | 1 | m | - | Mozambique | - | - | - | - | - | - | NA | NA |
| 774 | MZ015 | w  | 3  | <i>Ma. africana</i>  | 1 | m | - | Mozambique | - | - | - | - | - | - | NA | NA |
| 775 | MZ015 | w  | 4  | <i>Ma. africana</i>  | 1 | m | - | Mozambique | - | - | - | - | - | - | NA | NA |
| 776 | MZ015 | w  | 5  | <i>Ma. africana</i>  | 1 | m | - | Mozambique | - | - | - | - | - | - | NA | NA |
| 777 | MZ015 | w  | 6  | <i>Ma. africana</i>  | 1 | m | - | Mozambique | - | - | - | - | - | - | NA | NA |
| 778 | MZ015 | w  | 7  | <i>Ma. africana</i>  | 1 | m | - | Mozambique | - | - | - | - | - | - | NA | NA |
| 779 | MZ011 | m  | 5  | <i>Ma. uniformis</i> | 1 | m | - | Mozambique | - | - | - | - | - | - | NA | NA |
| 780 | MZ011 | m  | 6  | <i>Ma. uniformis</i> | 1 | m | - | Mozambique | - | - | - | - | - | - | NA | NA |
| 781 | MZ011 | m  | 7  | <i>Ma. uniformis</i> | 1 | m | - | Mozambique | - | - | - | - | - | - | NA | NA |

|     |         |    |    |                        |   |   |   |              |   |   |   |   |   |   |    |    |
|-----|---------|----|----|------------------------|---|---|---|--------------|---|---|---|---|---|---|----|----|
| 782 | MZ011   | m  | 9  | <i>Ma. uniformis</i>   | 1 | m | - | Mozambique   | - | - | - | - | - | - | NA | NA |
| 783 | MZ012   | j  | 9  | <i>Ma. uniformis</i>   | 1 | m | - | Mozambique   | - | - | - | - | - | - | NA | NA |
| 784 | MZ013   | ab | 1  | <i>Ma. uniformis</i>   | 1 | m | - | Mozambique   | - | - | - | - | - | - | NA | NA |
| 785 | MZ013   | ab | 3  | <i>Ma. uniformis</i>   | 1 | m | - | Mozambique   | - | - | - | - | - | - | NA | NA |
| 786 | MZ014   | m  | 8  | <i>Ma. uniformis</i>   | 1 | m | - | Mozambique   | - | - | - | - | - | - | NA | NA |
| 787 | MZ023   | c3 | 1  | <i>Ma. uniformis</i>   | 1 | m | - | Mozambique   | - | - | - | - | - | - | NA | NA |
| 788 | MZ039   | b5 | 2  | <i>Ma. uniformis</i>   | 1 | m | - | Mozambique   | - | - | - | - | - | - | NA | NA |
| 789 | PTH 003 | a  | 1  | <i>Cx. telesilla</i>   | 1 | m | - | South Africa | - | - | - | - | - | - | NA | NA |
| 790 | PTH 003 | a  | 6  | <i>Cx. telesilla</i>   | 1 | m | - | South Africa | - | - | - | - | - | - | NA | NA |
| 791 | PTH 003 | a  | 8  | <i>Cx. telesilla</i>   | 1 | m | - | South Africa | - | - | - | - | - | - | NA | NA |
| 792 | PTH 003 | a  | 9  | <i>Cx. telesilla</i>   | 1 | m | - | South Africa | - | - | - | - | - | - | NA | NA |
| 793 | PTH 003 | a  | 12 | <i>Cx. telesilla</i>   | 1 | m | - | South Africa | - | - | - | - | - | - | NA | NA |
| 794 | PTH 003 | a  | 13 | <i>Cx. telesilla</i>   | 1 | m | - | South Africa | - | - | - | - | - | - | NA | NA |
| 795 | PTH 003 | a  | 14 | <i>Cx. telesilla</i>   | 1 | m | - | South Africa | - | - | - | - | - | - | NA | NA |
| 796 | PTH 003 | a  | 15 | <i>Cx. telesilla</i>   | 1 | m | - | South Africa | - | - | - | - | - | - | NA | NA |
| 797 | PTH 003 | a  | 16 | <i>Cx. telesilla</i>   | 1 | m | - | South Africa | - | - | - | - | - | - | NA | NA |
| 798 | PTH 003 | a  | 17 | <i>Cx. telesilla</i>   | 1 | m | - | South Africa | - | - | - | - | - | - | NA | NA |
| 799 | LAP260  | q  |    | <i>Ur. mashonensis</i> | 1 | m | - | South Africa | - | - | - | - | - | - | NA | NA |
| 800 | LAP263  | r  |    | <i>Ur. mashonensis</i> | 1 | m | - | South Africa | - | - | - | - | - | - | NA | NA |

**NA:** not applicable, **negative:** samples that the PCR was carried out, but that it was not possible to amplify, -: samples that were not used for the PCR
